# Supplementary material for: Direct fluorination of styrenes
Source: Royal Society of Chemistry journal article supplement (doi:10.1039/c5cc01407g), 2015-01-01

# Ruthenium-catalyzed Fluorination of Alkenes

Qian Shao,<sup>a</sup> and Yong Huang<sup>a,\*</sup>

<sup>a</sup> Key Laboratory of Chemical Genomics, School of Chemical Biology and Biotechnology, Peking University, Shenzhen Graduate School, Shenzhen, 518055 China.

Email: huangyong@pkusz.edu.cn

## Supporting Information

### Table of Contents:

|                                                                                    |       |
|------------------------------------------------------------------------------------|-------|
| General Methods and Materials                                                      | 2     |
| General Procedure for 1,2-disubstituted Alkenes                                    | 3     |
| General Procedure for Chromene Derivatives                                         | 3-4   |
| General Procedure for the Synthesis of Fluoroalkene and Fluorochromene Derivatives | 4     |
| Characterization of the Products                                                   | 5-10  |
| Mechanistic Experiments                                                            | 11    |
| References                                                                         | 12    |
| NMR Spectra Images of Substrates and Products                                      | 13-37 |

## General Methods and Materials:

All other reagents were purchased and used without further purification unless specified otherwise. Solvents for chromatography were technical grade and distilled prior to use. Flash chromatography was performed using 200-300 mesh silica gel (Qingdao Haiyang Chemical HG/T2354-92) with the indicated solvent system according to standard techniques. Analytical thin-layer chromatography (TLC) was performed using Huanghai silica gel plates with HSGF 254. Visualization of the developed chromatogram was performed by UV absorbance (254 nm) or appropriate stains. NMR data were recorded on Bruker 400M nuclear resonance spectrometers (400 MHz for  $^1\text{H}$ ; 376 MHz for  $^{19}\text{F}$ ; 100 MHz for  $^{13}\text{C}$ ) unless otherwise specified. Chemical shifts ( $\delta$ ) in ppm are reported as quoted relative to the residual signals of chloroform ( $^1\text{H}$  7.26 ppm or  $^{13}\text{C}$  77.16 ppm). Multiplicities are described as: s (singlet), bs (broad singlet), d (doublet), t (triplet), q (quartet), m (multiplet); and coupling constants ( $J$ ) are reported in Hertz (Hz).  $^{13}\text{C}$  NMR spectra were recorded with total proton decoupling. HRMS (APCI) analysis was performed by The Analytical Instrumentation Center at Peking University; Shenzhen Graduate School and the data were reported with ion mass/charge ( $m/z$ ) ratios as values in atomic mass units.

## General Procedure for 1,2-disubstituted Alkenes

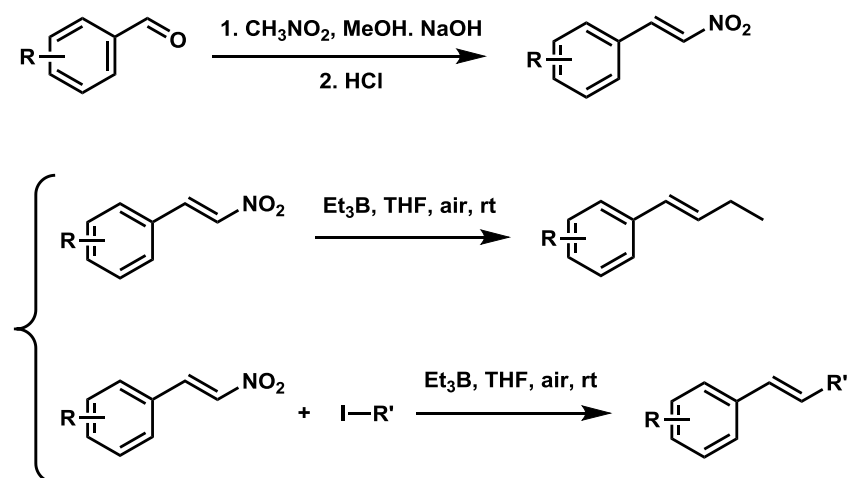

To a mixture of aldehyde (1 equiv) and nitromethane (1 equiv) in methanol at 0 °C, a solution of NaOH in H<sub>2</sub>O (1.2 equiv) was added dropwise. Further methanol was added and the resulting slurry stirred at that temperature for 1 h. Water (30 mL) was added and the clear solution was poured into hydrochloric acid (5 M) and stirred for 15 min. The aqueous mixture was extracted with DCM (20 mL x 3), the combined organic layers dried over magnesium sulfate and the solvent removed using a rotary evaporator. The residue was purified by column chromatography (petrolether/EtOAc) to yield nitroalkenes.<sup>1</sup>

### Ethyl-substituted alkenes:

Nitroalkene (1 equiv) and Et<sub>3</sub>B (3 equiv) stirred in THF at r.t. The solution was bubbled with the air that filled in the balloon. After 10 min, the solution was evaporated and the oily residue was purified by flash column chromatography by hexane.

### Other alkyl-substituted alkenes:

Nitroalkene (1 equiv) and alkyl iodide (20 equiv) stirred in THF at r.t. The solution was bubbled with the air that filled in the balloon. Meantime, Et<sub>3</sub>B (3 equiv) was added. After 10 min to 1 h, the solution was evaporated and the oily residue was purified by flash column chromatography by hexane.

The spectroscopic data for substrates **2e-2i** were identical to those described in reference 2. Other styrenes were purchased from Energy Chemical.

## General Procedure for Chromene Derivatives

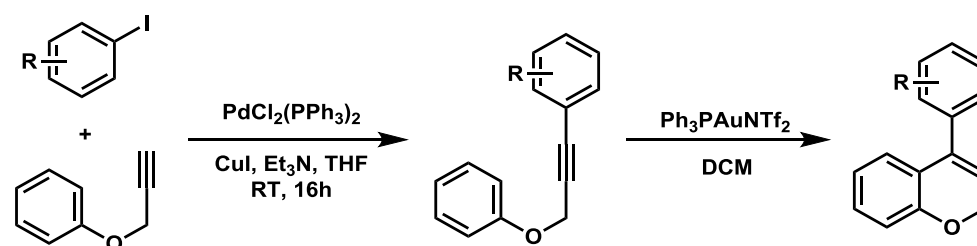

To a suspension of *trans*-dichloro-*bis*-(triphenylphosphine)palladium(II) (1-5 mol%) and copper(I) iodine (2-10 mol%) in tetrahydrofuran (0.2 M) was added the appropriate iodoarene (1.0 equiv.) and triethylamine (7.0 equiv.). The corresponding alkyne (1.1 equiv.) was added and the reaction mixture stirred at room temperature for the specified length of time. The reaction mixture was concentrated *in vacuo* and filtered through a plug of celite and silica, eluting with diethyl ether (3 × 25 mL). The solvent was removed *in vacuo* and the crude residue was purified by flash chromatography to yield the corresponding alkyne.<sup>3</sup>

The above alkyne (1 equiv) and catalyst (0.05 equiv) stirred in DCM at r.t. for 30 min to 4 h. When the reaction completed, the solution was evaporated and the oily residue was purified by flash column chromatography by hexane.<sup>4</sup>

The spectroscopic data for substrates **3a-3c**, **3e-3f** were identical to those described in reference 5. Analytic data for compound **3d** (new compound) is presented on pages 7-8 (copies of NMR: pages 27-28).

#### General Procedure for the Synthesis of Fluoroalkene and Fluorochromene Derivatives:

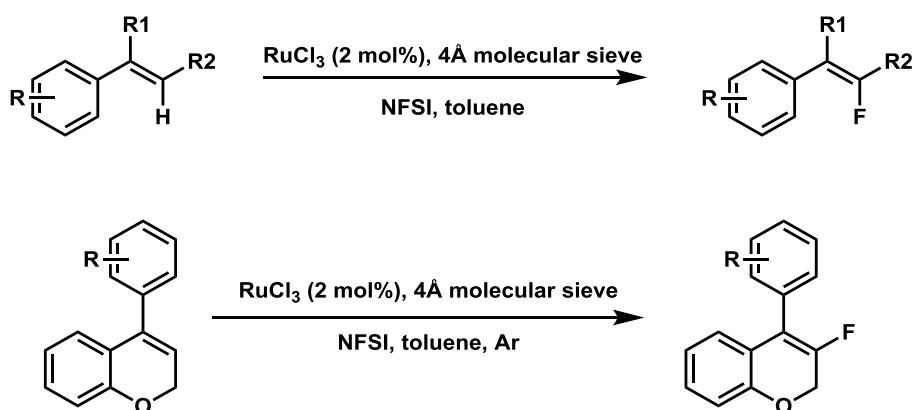

A reaction tube was charged with ruthenium(III) chloride (2 mol%), molecular sieve and NFSI (1.2 equiv.). A solution of the corresponding alkene (1.0 equiv.) in toluene (0.2 M) was added, and the reaction mixture stirred at the specified temperature for the specified length of time. When the reaction completed, the reaction mixture was cooled to room temperature. The reaction mixture was filtered through a plug of silica, eluting with diethyl ether. The solvent was removed *in vacuo* and the crude residue was purified by flash chromatography to yield the corresponding product. The spectral data for **2a**<sup>6</sup> and **2j**<sup>7</sup> were identical to those reported in the literature.

## Characterization of the Products

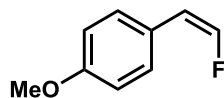

### (Z)-1-(2-fluorovinyl)-4-methoxybenzene (2b):

75% yield, colourless liquid.  $R_f = 0.5$  (EtOAc:Hexane = 1:10).  $^1\text{H}$  NMR (400 MHz,  $\text{CDCl}_3$ )  $\delta$  7.46 (d,  $J = 8.8$  Hz, 2H), 6.90 – 6.87 (m, 2H), 6.60 (dd,  $J = 83.1, 5.3$  Hz, 1H), 5.56 (dd,  $J = 45.2, 5.3$  Hz, 1H), 3.83 (s, 3H).  $^{13}\text{C}$  NMR (101 MHz,  $\text{CDCl}_3$ )  $\delta$  158.88, 147.00 (d,  $J = 267.6$  Hz), 130.12 (d,  $J = 7.1$  Hz), 127.56 – 125.03 (m), 113.91, 110.21, 55.25.  $^{19}\text{F}$  NMR (376 MHz,  $\text{CDCl}_3$ )  $\delta$  -125.36. HRMS (APCI) Calcd. for  $\text{C}_9\text{H}_{10}\text{FO}$  ( $[\text{M}+\text{H}]^+$ ): 153.0710; Found: 153.0712.

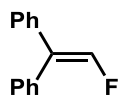

### (2-fluoroethene-1,1-diyl)dibenzene (2c):

51% yield, colourless liquid.  $R_f = 0.5$  (EtOAc:Hexane = 1:20).  $^1\text{H}$  NMR (400 MHz,  $\text{CDCl}_3$ )  $\delta$  7.37 (ddd,  $J = 11.8, 4.6, 1.7$  Hz, 9H), 7.26 – 7.24 (m, 1H), 6.98 (d,  $J = 83.4$  Hz, 1H).  $^{13}\text{C}$  NMR (101 MHz,  $\text{CDCl}_3$ )  $\delta$  145.80 (d,  $J = 268.4$  Hz), 137.02 (d,  $J = 8.2$  Hz), 135.16, 129.78 (d,  $J = 4.3$  Hz), 128.70 (d,  $J = 3.1$  Hz), 128.53, 128.32 – 128.13 (m), 127.81 (d,  $J = 4.0$  Hz), 126.26 (d,  $J = 5.5$  Hz).  $^{19}\text{F}$  NMR (376 MHz,  $\text{CDCl}_3$ )  $\delta$  -128.09. HRMS (APCI) Calcd. for  $\text{C}_{14}\text{H}_{12}\text{F}$  ( $[\text{M}+\text{H}]^+$ ): 199.0918; Found: 199.0914.

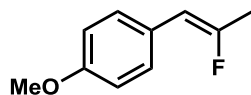

### (Z)-1-(2-fluoroprop-1-en-1-yl)-4-methoxybenzene (2d):

93% yield, colourless liquid.  $R_f = 0.5$  (EtOAc:Hexane = 1:10).  $^1\text{H}$  NMR (400 MHz,  $\text{CDCl}_3$ )  $\delta$  7.40 (d,  $J = 8.8$  Hz, 2H), 6.86 (d,  $J = 8.9$  Hz, 2H), 5.41 (d,  $J = 39.2$  Hz, 1H), 3.81 (s, 3H), 2.06 (dd,  $J = 16.8, 0.5$  Hz, 3H).  $^{13}\text{C}$  NMR (101 MHz,  $\text{CDCl}_3$ )  $\delta$  158.21 (d,  $J = 2.7$  Hz), 156.38 (d,  $J = 261.4$  Hz), 129.32 (d,  $J = 7.3$  Hz), 126.68 (d,  $J = 2.5$  Hz), 113.82, 105.66 (d,  $J = 9.2$  Hz), 55.23, 18.94 (d,  $J = 29.5$  Hz).  $^{19}\text{F}$  NMR (376 MHz,  $\text{CDCl}_3$ )  $\delta$  -97.42. HRMS (APCI) Calcd. for  $\text{C}_{10}\text{H}_{12}\text{FO}$  ( $[\text{M}+\text{H}]^+$ ): 167.0867; Found: 167.0863.

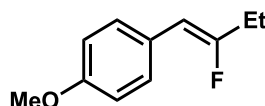

### (Z)-1-(2-fluorobut-1-en-1-yl)-4-methoxybenzene (2e):

89% yield, colourless liquid.  $R_f = 0.5$  (EtOAc:Hexane = 1:10).  $^1\text{H}$  NMR (400 MHz,  $\text{CDCl}_3$ )  $\delta$  7.43 (d,  $J = 8.8$  Hz, 2H), 6.87 (d,  $J = 8.8$  Hz, 2H), 5.41 (d,  $J = 40.0$  Hz, 1H), 3.82 (s, 3H), 2.36 (dq,  $J = 15.0, 7.4$  Hz, 2H), 1.18 (t,  $J = 7.5$  Hz, 3H).  $^{13}\text{C}$  NMR (101 MHz,  $\text{CDCl}_3$ )  $\delta$  162.50, 159.04 (d,  $J =$

168.3 Hz), 129.45 (d,  $J = 7.4$  Hz), 126.81 (d,  $J = 33.1$  Hz), 113.81, 104.01 (d,  $J = 9.2$  Hz), 55.24, 26.20 (d,  $J = 27.7$  Hz), 11.01 (d,  $J = 3.4$  Hz).  $^{19}\text{F}$  NMR (376 MHz,  $\text{CDCl}_3$ )  $\delta$  -103.60. HRMS (APCI) Calcd. for  $\text{C}_{11}\text{H}_{14}\text{FO}$  ( $[\text{M}+\text{H}]^+$ ): 181.1023; Found: 181.1021.

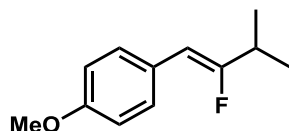

**(Z)-1-(2-fluoro-3-methylbut-1-en-1-yl)-4-methoxybenzene (2f):**

91% yield, colourless liquid.  $R_f = 0.5$  (EtOAc:Hexane = 1:10).  $^1\text{H}$  NMR (400 MHz,  $\text{CDCl}_3$ )  $\delta$  7.43 (d,  $J = 8.8$  Hz, 2H), 6.88 – 6.85 (m, 2H), 5.42 (d,  $J = 40.6$  Hz, 1H), 3.82 (s, 3H), 2.56 (ddt,  $J = 20.6, 13.7, 6.9$  Hz, 1H), 1.19 (d,  $J = 6.9$  Hz, 6H).  $^{13}\text{C}$  NMR (101 MHz,  $\text{CDCl}_3$ )  $\delta$  164.48 (d,  $J = 265.8$  Hz), 158.17, 129.54 (d,  $J = 7.5$  Hz), 126.84 (d,  $J = 36.2$  Hz), 113.81, 102.67 (d,  $J = 9.5$  Hz), 55.24, 31.96 (d,  $J = 26.0$  Hz), 19.82 (d,  $J = 2.7$  Hz).  $^{19}\text{F}$  NMR (376 MHz,  $\text{CDCl}_3$ )  $\delta$  -109.38. HRMS (APCI) Calcd. for  $\text{C}_{12}\text{H}_{16}\text{FO}$  ( $[\text{M}+\text{H}]^+$ ): 195.1180; Found: 195.1175.

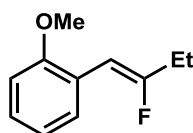

**(Z)-1-(2-fluorobut-1-en-1-yl)-2-methoxybenzene (2g):**

91% yield, colourless liquid.  $R_f = 0.5$  (EtOAc:Hexane = 1:10).  $^1\text{H}$  NMR (400 MHz,  $\text{CDCl}_3$ )  $\delta$  7.77 (dd,  $J = 7.7, 1.6$  Hz, 1H), 7.20 (d,  $J = 7.3$  Hz, 2H), 6.97 – 6.92 (m, 1H), 6.89 – 6.84 (m, 1H), 5.88 (d,  $J = 40.7$  Hz, 1H), 3.84 (s, 3H), 2.47 – 2.33 (m, 2H), 1.20 (t,  $J = 7.5$  Hz, 3H).  $^{13}\text{C}$  NMR (101 MHz,  $\text{CDCl}_3$ )  $\delta$  162.73 (d,  $J = 221.6$  Hz), 155.82, 129.74 (d,  $J = 12.5$  Hz), 128.70 (d,  $J = 48.3$  Hz), 127.72, 120.60, 110.38, 98.01 (d,  $J = 7.3$  Hz), 55.52, 26.54 (d,  $J = 27.8$  Hz), 11.01 (d,  $J = 3.5$  Hz).  $^{19}\text{F}$  NMR (376 MHz,  $\text{CDCl}_3$ )  $\delta$  -102.51. HRMS (APCI) Calcd. for  $\text{C}_{11}\text{H}_{14}\text{FO}$  ( $[\text{M}+\text{H}]^+$ ): 181.1023; Found: 181.1020.

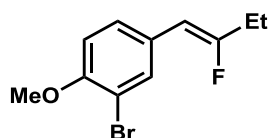

**(Z)-2-bromo-4-(2-fluorobut-1-en-1-yl)-1-methoxybenzene (2h):**

75% yield, pale yellow liquid.  $R_f = 0.4$  (EtOAc:Hexane = 1:10).  $^1\text{H}$  NMR (400 MHz,  $\text{CDCl}_3$ )  $\delta$  7.69 (d,  $J = 2.0$  Hz, 1H), 7.38 (dd,  $J = 8.6, 2.1$  Hz, 1H), 6.85 (d,  $J = 8.6$  Hz, 1H), 5.35 (d,  $J = 39.2$  Hz, 1H), 3.90 (s, 3H), 2.34 (dt,  $J = 15.0, 7.5$  Hz, 2H), 1.17 (t,  $J = 7.5$  Hz, 3H).  $^{13}\text{C}$  NMR (101 MHz,  $\text{CDCl}_3$ )  $\delta$  162.11 (d,  $J = 265.4$  Hz), 154.39, 132.99 (d,  $J = 7.9$  Hz), 130.50 – 125.58 (m), 111.60 (d,  $J = 18.0$  Hz), 103.00 (d,  $J = 9.1$  Hz), 56.24, 26.16 (d,  $J = 27.4$  Hz), 10.90 (d,  $J = 3.5$  Hz).  $^{19}\text{F}$  NMR (376 MHz,  $\text{CDCl}_3$ )  $\delta$  -101.68. HRMS (APCI) Calcd. for  $\text{C}_{11}\text{H}_{13}\text{BrFO}$  ( $[\text{M}+\text{H}]^+$ ): 259.0128; Found: 259.0131.

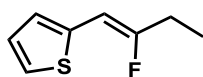

**(Z)-2-(2-fluorobut-1-en-1-yl)thiophene (2i):**

46% yield, pale yellow liquid.  $R_f = 0.5$  (EtOAc:Hexane = 1:20).  $^1\text{H}$  NMR (400 MHz,  $\text{CDCl}_3$ )  $\delta$  7.21 (d,  $J = 5.0$  Hz, 1H), 7.00 (d,  $J = 2.8$  Hz, 1H), 6.99 – 6.94 (m, 1H), 5.80 (d,  $J = 38.6$  Hz, 1H), 2.37 (dd,  $J = 14.7, 7.3$  Hz, 2H), 1.18 (d,  $J = 7.4$  Hz, 4H).  $^{13}\text{C}$  NMR (101 MHz,  $\text{CDCl}_3$ )  $\delta$  161.34 (d,  $J = 265.2$  Hz), 136.25, 126.67, 125.63 (d,  $J = 3.7$  Hz), 124.89 (d,  $J = 9.0$  Hz), 99.61 (d,  $J = 12.8$  Hz), 25.70 (d,  $J = 26.5$  Hz), 10.86 (d,  $J = 3.5$  Hz).  $^{19}\text{F}$  NMR (376 MHz,  $\text{CDCl}_3$ )  $\delta$  -97.31. HRMS (APCI) Calcd. for  $\text{C}_8\text{H}_{10}\text{FS}$  ( $[\text{M}+\text{H}]^+$ ): 157.0482; Found: 157.0479.

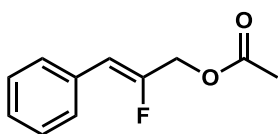

**(Z)-2-fluoro-3-phenylallyl acetate (2k):**

50% yield, white solid.  $R_f = 0.4$  (EtOAc:Hexane = 1:10).  $^1\text{H}$  NMR (400 MHz,  $\text{CDCl}_3$ )  $\delta$  7.57 – 7.49 (m, 2H), 7.35 (dd,  $J = 10.5, 4.4$  Hz, 2H), 7.29 (d,  $J = 7.3$  Hz, 1H), 5.85 (d,  $J = 37.4$  Hz, 1H), 4.74 (d,  $J = 17.8$  Hz, 2H), 2.15 (s, 3H).  $^{13}\text{C}$  NMR (101 MHz,  $\text{CDCl}_3$ )  $\delta$  170.44, 154.01 (d,  $J = 266.1$  Hz), 132.26 (d,  $J = 3.2$  Hz), 128.90 (d,  $J = 7.4$  Hz), 128.55, 127.95 (d,  $J = 2.3$  Hz), 127.10, 111.02 (d,  $J = 6.7$  Hz), 62.92 (d,  $J = 30.9$  Hz), 20.82.  $^{19}\text{F}$  NMR (376 MHz,  $\text{CDCl}_3$ )  $\delta$  -111.26. HRMS (APCI) Calcd. for  $\text{C}_{11}\text{H}_{12}\text{FO}_2$  ( $[\text{M}+\text{H}]^+$ ): 195.0816; Found: 195.0811.

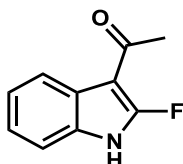

**1-(2-fluoro-1H-indol-3-yl)ethan-1-one (2l):**

80% yield, white solid.  $R_f = 0.5$  (EtOAc:Hexane = 1:10).  $^1\text{H}$  NMR (400 MHz,  $\text{CDCl}_3$ )  $\delta$  8.64 (s, 1H), 7.72 (dd,  $J = 8.2, 0.8$  Hz, 1H), 7.41 – 7.33 (m, 2H), 7.17 (ddd,  $J = 8.0, 6.5, 1.3$  Hz, 1H), 2.66 (d,  $J = 2.6$  Hz, 3H).  $^{13}\text{C}$  NMR (101 MHz,  $\text{CDCl}_3$ )  $\delta$  188.49, 148.13 (d,  $J = 262.6$  Hz), 133.69, 127.74, 121.09, 119.71 (d,  $J = 20.4$  Hz), 119.47 (d,  $J = 2.8$  Hz), 116.46 (d,  $J = 16.1$  Hz), 112.53, 27.99 (d,  $J = 4.7$  Hz).  $^{19}\text{F}$  NMR (376 MHz,  $\text{CDCl}_3$ )  $\delta$  -154.79. HRMS (APCI) Calcd. for  $\text{C}_{10}\text{H}_9\text{FNO}$  ( $[\text{M}+\text{H}]^+$ ): 178.0663; Found: 178.0662.

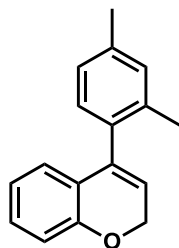

**4-(2,4-dimethyl)-2H-chromene (3d):**

82% yield, colourless liquid.  $R_f = 0.5$  (EtOAc:Hexane = 1:20).  $^1\text{H}$  NMR (400 MHz,  $\text{CDCl}_3$ )  $\delta$  7.18 – 7.08 (m, 4H), 6.92 (d,  $J = 8.1$  Hz, 1H), 6.82 (td,  $J = 7.5, 1.1$  Hz, 1H), 6.68 (dd,  $J = 7.6, 1.4$  Hz, 1H), 5.70 (t,  $J = 3.7$  Hz, 1H), 4.96 (t,  $J = 3.2$  Hz, 2H), 2.42 (s, 3H), 2.18 (s, 3H).  $^{13}\text{C}$  NMR (101 MHz,  $\text{CDCl}_3$ )  $\delta$  154.13, 137.51, 136.64, 136.37, 134.99, 130.87, 129.73, 129.15, 126.59, 125.64, 123.96, 121.29, 120.40, 116.01, 65.55, 21.22, 19.82. HRMS (APCI) Calcd. for  $\text{C}_{17}\text{H}_{16}\text{O}$  ( $[\text{M}+\text{H}]^+$ ): 237.1279; Found: 237.1283.

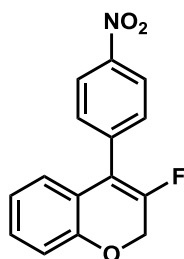

**3-fluoro-4-(4-nitrophenyl)-2H-chromene (4a):**

71% yield, yellow solid.  $R_f = 0.4$  (EtOAc:Hexane = 1:20).  $^1\text{H}$  NMR (400 MHz,  $\text{CDCl}_3$ )  $\delta$  8.32 (d,  $J = 8.8$  Hz, 2H), 7.56 (d,  $J = 8.5$  Hz, 2H), 7.20 – 7.12 (m, 1H), 6.98 – 6.87 (m, 2H), 6.81 (dd,  $J = 7.7, 1.5$  Hz, 1H), 4.93 (d,  $J = 3.2$  Hz, 2H).  $^{13}\text{C}$  NMR (101 MHz,  $\text{CDCl}_3$ )  $\delta$  151.89, 148.35 (d,  $J = 153.2$  Hz), 138.14, 131.00 (d,  $J = 2.1$  Hz), 128.76 (d,  $J = 2.3$  Hz), 125.34 (d,  $J = 6.6$  Hz), 123.77, 122.26, 121.88, 116.33, 113.22 (d,  $J = 9.4$  Hz), 63.80 (d,  $J = 36.0$  Hz).  $^{19}\text{F}$  NMR (376 MHz,  $\text{CDCl}_3$ )  $\delta$  -115.85. HRMS (APCI) Calcd. for  $\text{C}_{15}\text{H}_{11}\text{FNO}_3$  ( $[\text{M}+\text{H}]^+$ ): 272.0717; Found: 272.0710.

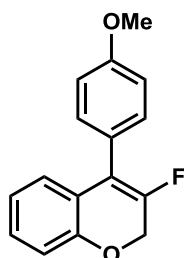

**3-fluoro-4-(4-methoxyphenyl)-2H-chromene (4b):**

75% yield, colourless liquid.  $R_f = 0.5$  (EtOAc:Hexane = 1:20).  $^1\text{H}$  NMR (400 MHz,  $\text{CDCl}_3$ )  $\delta$  7.29 (d,  $J = 8.3$  Hz, 2H), 7.15 – 7.09 (m, 1H), 6.99 (d,  $J = 8.8$  Hz, 2H), 6.93 – 6.86 (m, 3H), 4.91 (d,  $J = 3.0$  Hz, 2H), 3.86 (s, 3H).  $^{13}\text{C}$  NMR (101 MHz,  $\text{CDCl}_3$ )  $\delta$  159.37, 151.99, 149.11 (d,  $J = 270.6$  Hz).



Hz), 131.14 (d,  $J = 1.8$  Hz), 127.96 (d,  $J = 2.3$  Hz), 125.78 (d,  $J = 6.7$  Hz), 123.34 (d,  $J = 3.4$  Hz), 123.11, 121.89, 115.84, 113.99, 64.01 (d,  $J = 37.2$  Hz), 55.30.  $^{19}\text{F}$  NMR (376 MHz,  $\text{CDCl}_3$ )  $\delta$  -119.90. HRMS (APCI) Calcd. for  $\text{C}_{16}\text{H}_{14}\text{FO}_2$  ( $[\text{M}+\text{H}]^+$ ): 257.0972; Found: 257.0971.

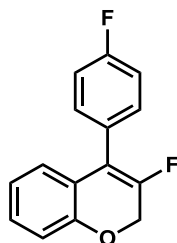

**3-fluoro-4-(4-fluorophenyl)-2H-chromene (4c):**

62% yield, white solid.  $R_f = 0.5$  (EtOAc:Hexane = 1:20).  $^1\text{H}$  NMR (400 MHz,  $\text{CDCl}_3$ )  $\delta$  7.33 (dd,  $J = 8.3, 5.5$  Hz, 2H), 7.17 – 7.10 (m, 3H), 6.94 – 6.83 (m, 3H), 4.91 (d,  $J = 3.0$  Hz, 2H).  $^{13}\text{C}$  NMR (101 MHz,  $\text{CDCl}_3$ )  $\delta$  162.49 (d,  $J = 247.5$  Hz), 151.89, 149.49 (d,  $J = 272.1$  Hz), 131.70 (d,  $J = 8.1$  Hz), 128.21 (d,  $J = 2.3$  Hz), 126.89, 125.58 (d,  $J = 6.6$  Hz), 123.53 (d,  $J = 124.5$  Hz), 122.01, 115.97, 115.60 (d,  $J = 21.5$  Hz), 113.68 (d,  $J = 10.0$  Hz), 63.92 (d,  $J = 36.8$  Hz).  $^{19}\text{F}$  NMR (376 MHz,  $\text{CDCl}_3$ )  $\delta$  -113.49, -118.31. HRMS (APCI) Calcd. for  $\text{C}_{15}\text{H}_{11}\text{F}_2\text{O}$  ( $[\text{M}+\text{H}]^+$ ): 245.0772; Found: 245.0767.

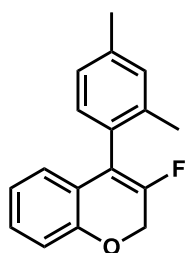

**4-(2,4-dimethylphenyl)-3-fluoro-2H-chromene (4d):**

72% yield, white solid.  $R_f = 0.5$  (EtOAc:Hexane = 1:20).  $^1\text{H}$  NMR (400 MHz,  $\text{CDCl}_3$ )  $\delta$  7.16 (s, 1H), 7.12 – 7.07 (m, 3H), 6.92 (dd,  $J = 8.0, 1.0$  Hz, 1H), 6.84 (t,  $J = 7.5$  Hz, 1H), 6.63 (dd,  $J = 7.6, 1.5$  Hz, 1H), 4.97 (d,  $J = 1.7$  Hz, 2H), 2.40 (s, 3H), 2.19 (s, 3H).  $^{13}\text{C}$  NMR (101 MHz,  $\text{CDCl}_3$ )  $\delta$  151.48, 149.16 (d,  $J = 268.9$  Hz), 138.14, 137.27, 131.11, 130.22, 127.95 (d,  $J = 2.4$  Hz), 127.40, 126.72, 125.46 (d,  $J = 6.7$  Hz), 123.09 (d,  $J = 3.9$  Hz), 121.95, 115.65, 63.92 (d,  $J = 37.3$  Hz), 21.24, 19.60.  $^{19}\text{F}$  NMR (376 MHz,  $\text{CDCl}_3$ )  $\delta$  -116.23. HRMS (APCI) Calcd. for  $\text{C}_{17}\text{H}_{16}\text{FO}$  ( $[\text{M}+\text{H}]^+$ ): 255.1180; Found: 255.1184.

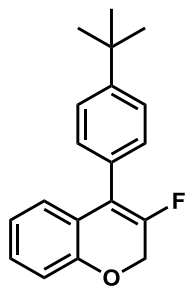

**4-(4-(tert-butyl)phenyl)-3-fluoro-2H-chromene (4e):**

75% yield, white solid.  $R_f = 0.5$  (EtOAc:Hexane = 1:20).  $^1\text{H}$  NMR (400 MHz,  $\text{CDCl}_3$ )  $\delta$  7.46 (d,  $J = 8.4$  Hz, 2H), 7.29 (d,  $J = 8.2$  Hz, 2H), 7.15 – 7.09 (m, 1H), 6.98 – 6.84 (m, 3H), 4.92 (d,  $J = 3.0$  Hz, 2H), 1.37 (s, 9H).  $^{13}\text{C}$  NMR (101 MHz,  $\text{CDCl}_3$ )  $\delta$  151.96, 151.02, 149.18 (d,  $J = 271.1$  Hz), 129.58 (d,  $J = 1.8$  Hz), 127.95 (d,  $J = 2.6$  Hz), 125.94 (d,  $J = 6.6$  Hz), 125.40, 123.23 (d,  $J = 3.3$  Hz), 121.86, 115.82, 114.37 (d,  $J = 10.2$  Hz), 64.00 (d,  $J = 37.2$  Hz), 34.68, 31.34.  $^{19}\text{F}$  NMR (376 MHz,  $\text{CDCl}_3$ )  $\delta$  -118.77. HRMS (APCI) Calcd. for  $\text{C}_{19}\text{H}_{20}\text{FO}$  ( $[\text{M}+\text{H}]^+$ ): 283.1493; Found: 283.1490.

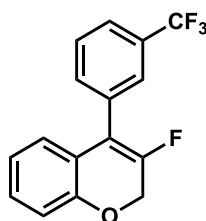

**3-fluoro-4-(3-(trifluoromethyl)phenyl)-2H-chromene (4f):**

54% yield, colourless liquid.  $R_f = 0.5$  (EtOAc:Hexane = 1:20).  $^1\text{H}$  NMR (400 MHz,  $\text{CDCl}_3$ )  $\delta$  7.69 – 7.62 (m, 2H), 7.56 (dd,  $J = 11.3, 7.6$  Hz, 2H), 7.18 – 7.13 (m, 1H), 6.94 (dd,  $J = 8.1, 1.0$  Hz, 1H), 6.90 (t,  $J = 7.5$  Hz, 1H), 6.81 (dd,  $J = 7.7, 1.6$  Hz, 1H), 4.93 (d,  $J = 3.0$  Hz, 2H).  $^{13}\text{C}$  NMR (101 MHz,  $\text{CDCl}_3$ )  $\delta$  151.86, 150.00 (d,  $J = 274.0$  Hz), 133.36, 131.97, 131.07 (d,  $J = 32.5$  Hz), 129.76, 129.06, 128.46 (d,  $J = 2.3$  Hz), 126.81 (dd,  $J = 3.6, 2.2$  Hz), 125.39 (d,  $J = 6.6$  Hz), 124.99 (dd,  $J = 7.4, 3.7$  Hz), 122.16, 116.13, 113.55 (d,  $J = 9.8$  Hz), 63.85 (d,  $J = 36.4$  Hz).  $^{19}\text{F}$  NMR (376 MHz,  $\text{CDCl}_3$ )  $\delta$  -62.63, -117.39. HRMS (APCI) Calcd. for  $\text{C}_{16}\text{H}_{11}\text{F}_4\text{O}$  ( $[\text{M}+\text{H}]^+$ ): 295.0741; Found: 295.0736.

## Deuterium kinetic isotope effect (DKIE) measurements

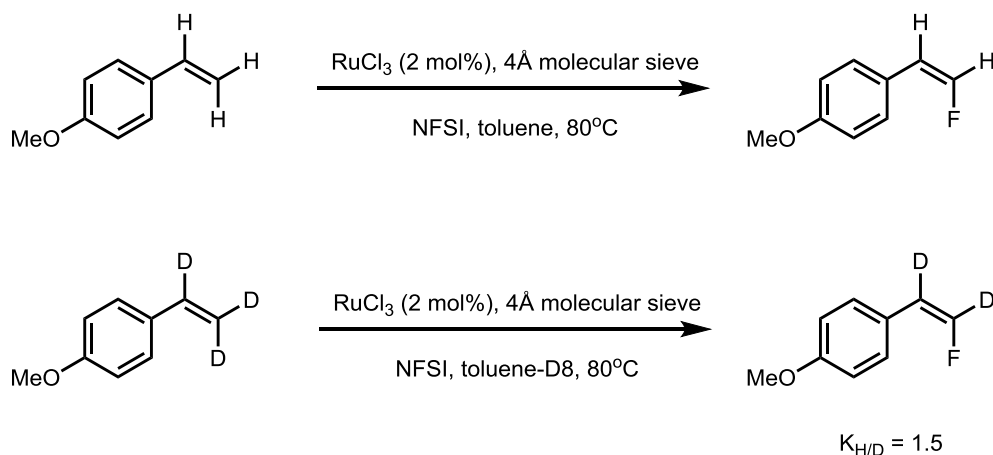

A sample experimental set-up is as follows: A reaction tube was charged with ruthenium(III) chloride (2 mol%), molecular sieve and NFSI (1.5 equiv.). A solution of the corresponding alkene or alkene-d<sub>3</sub> (0.4 mmol, 1.0 equiv.) in toluene or toluene-d<sub>8</sub> (0.2 M) was added. The tube was put into a oil bath (80 °C) to react to initiate the reaction and signify time zero (t =0). Aliquots (~ 0.05 mL) were removed at 15 min intervals for the first 80 mins. Each aliquot was filtered through a plug of silica, eluting with diethyl ether and analyzed by GC. A sample plot of the initial rate data for reactions of both 2b and 2b-D<sub>2</sub> are shown below. The isotope effect  $K_{H/D}$  was calculated as 1.5.

**Chart S1.** Plot of initial rates for DKIE measurements.

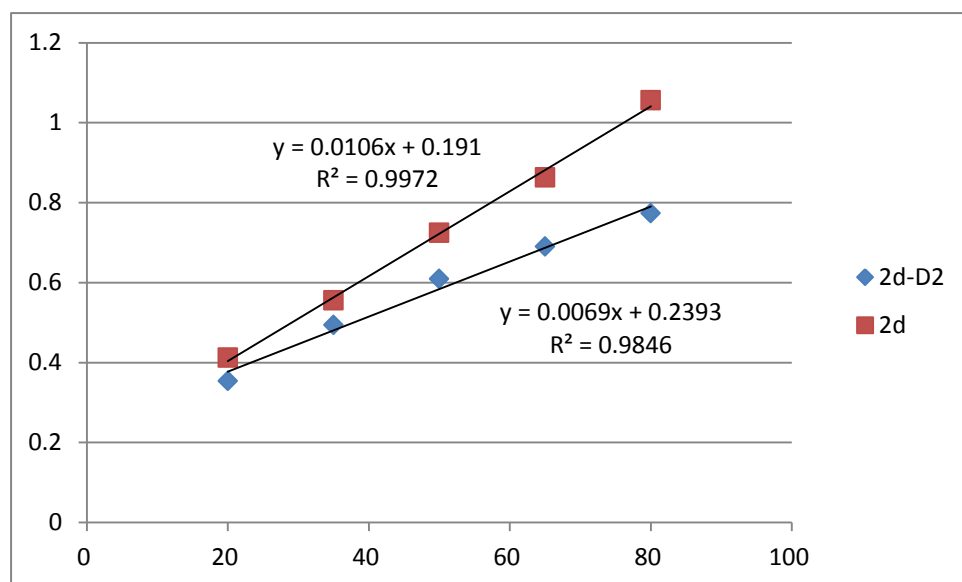

## References

1. Trost, B. M.; Müller, C. *J. Am. Chem. Soc.* **2008**, *130*, 2438.
2. Liu, J.; Jang, Y.; Shih, Y.; Hu, S.; Chu, C.; Yao, C. *J. Org. Chem.* **2001**, *66*, 6021
3. Walkinshaw, A. J.; Xu, W.; Suero, M. G.; Gaunt, M. J. *J. Am. Chem. Soc.* **2013**, *135*, 12532.
4. Lykakis, I. N.; Efe, C.; Gryparis, C.; Stratakis, M. *Eur. J. Org. Chem.* **2011**, 2334.
5. Aponick, A.; Biannic, B.; Jong, M. R. *Chem. Commun.* **2010**, *46*, 6849; Arcadi, A.; Blesi, F.; Cacchi, S.; Fabrizi, G. Goggiamani, A.; Marinelli, F. *Org. Biomol. Chem.* **2012**, *10*, 9700; Eguchi, T.; Hoshino, Y.; Ayame, A. *B. Chem. Soc. Jpn.* **2002**, *75*, 581.
6. Isogai, K.; Nishizawa, N.; Saito, t.; Sakai, J. *Bull. Chem. Soc. Jpn.* **1983**, 1555.
7. Yoshida, M.; Komata, A.; Hara, S. *Tetrahedron* **2006**, *62*, 8636.

# NMR Spectra Images

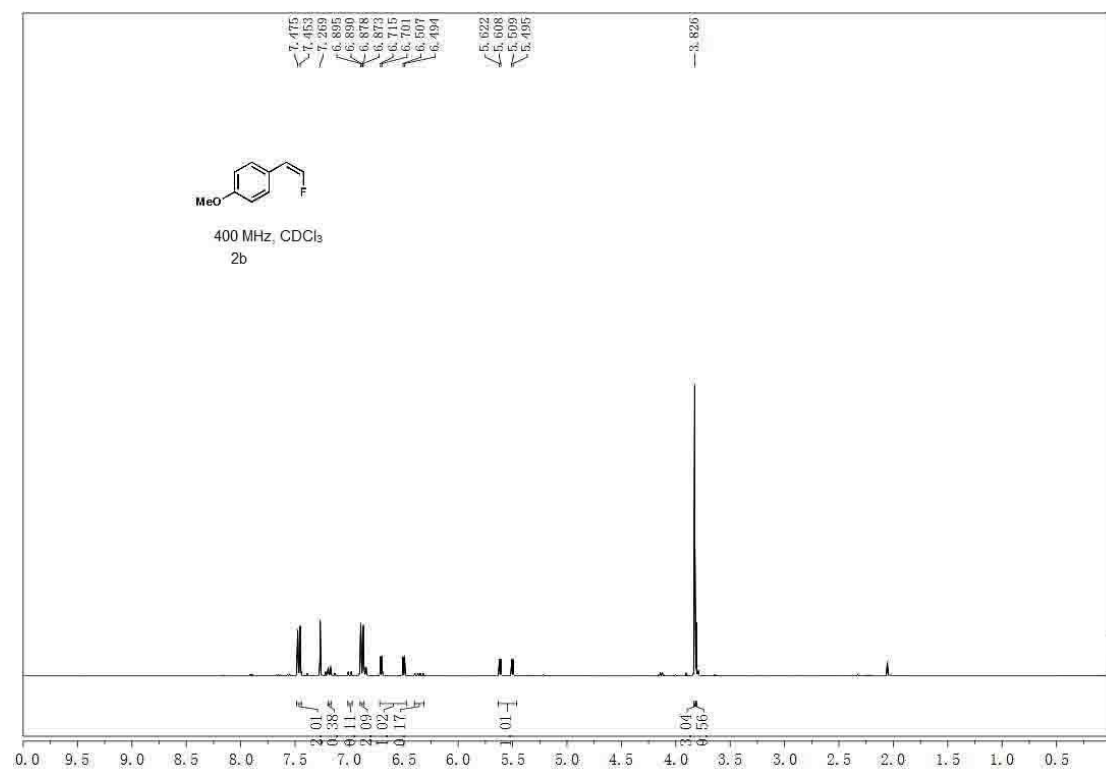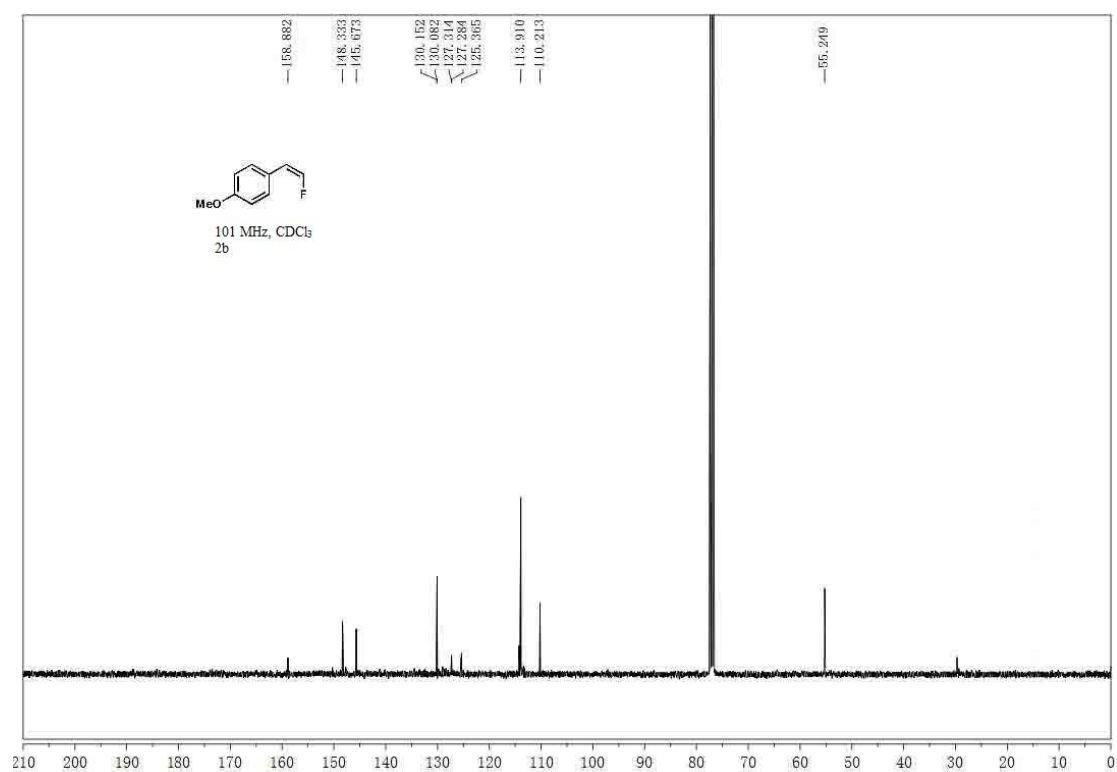

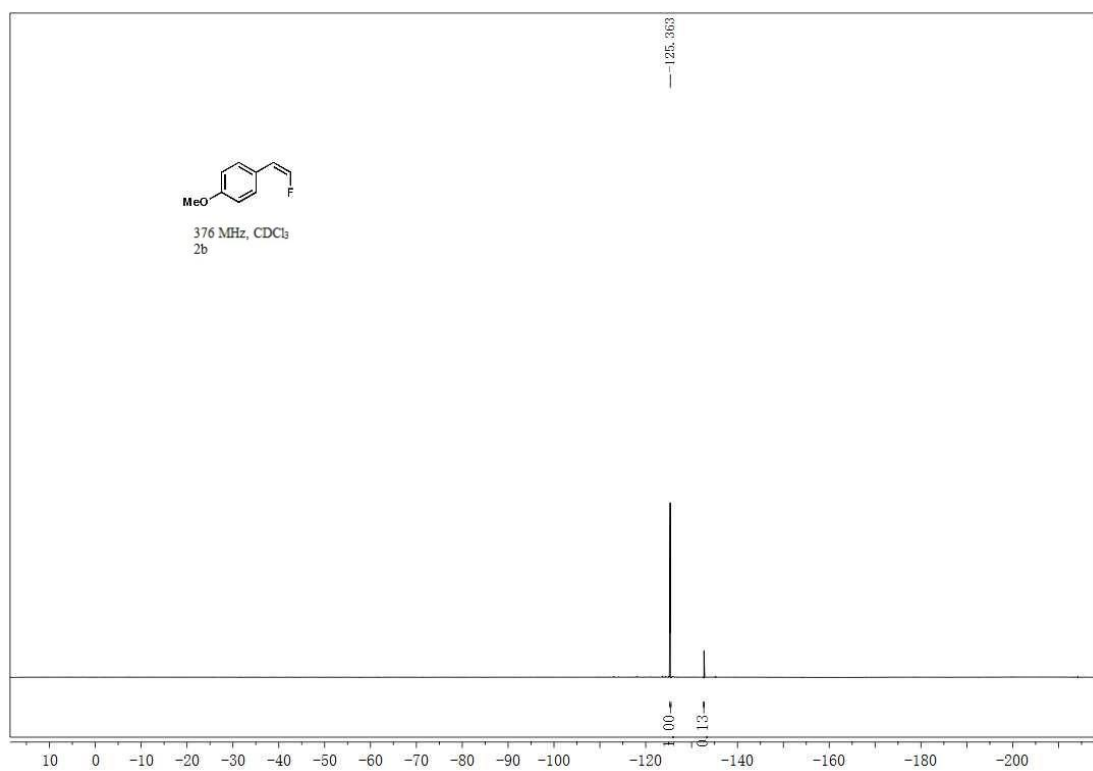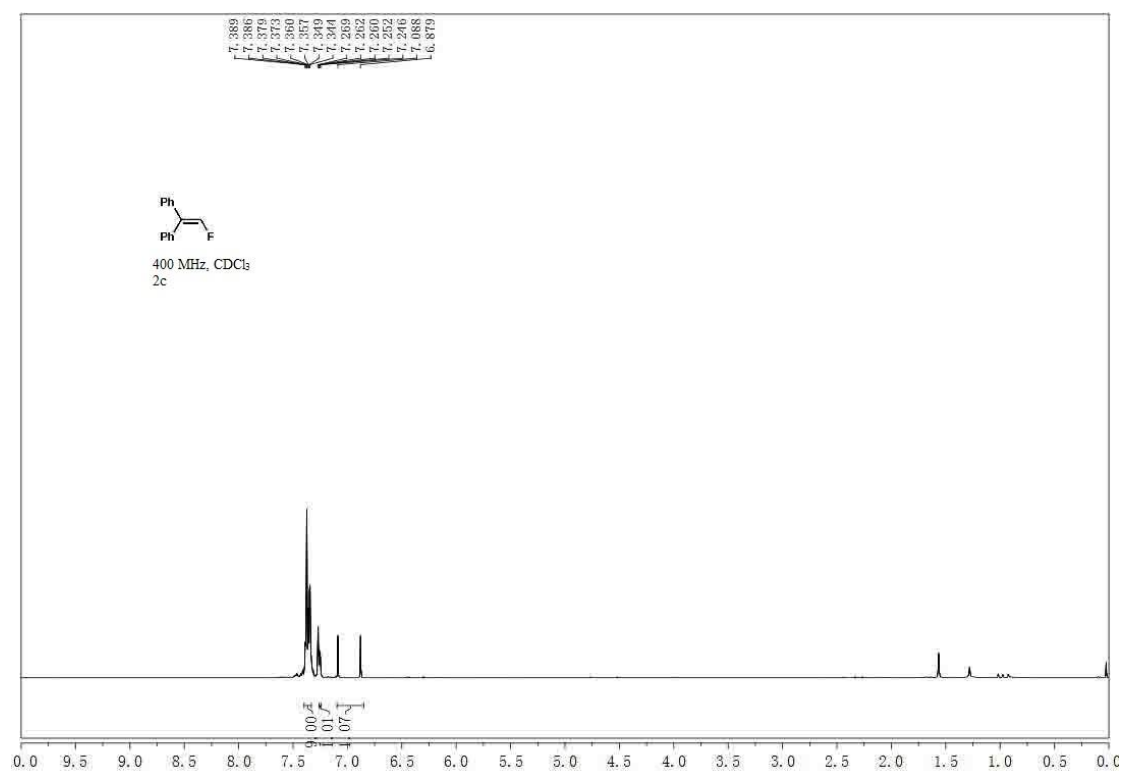

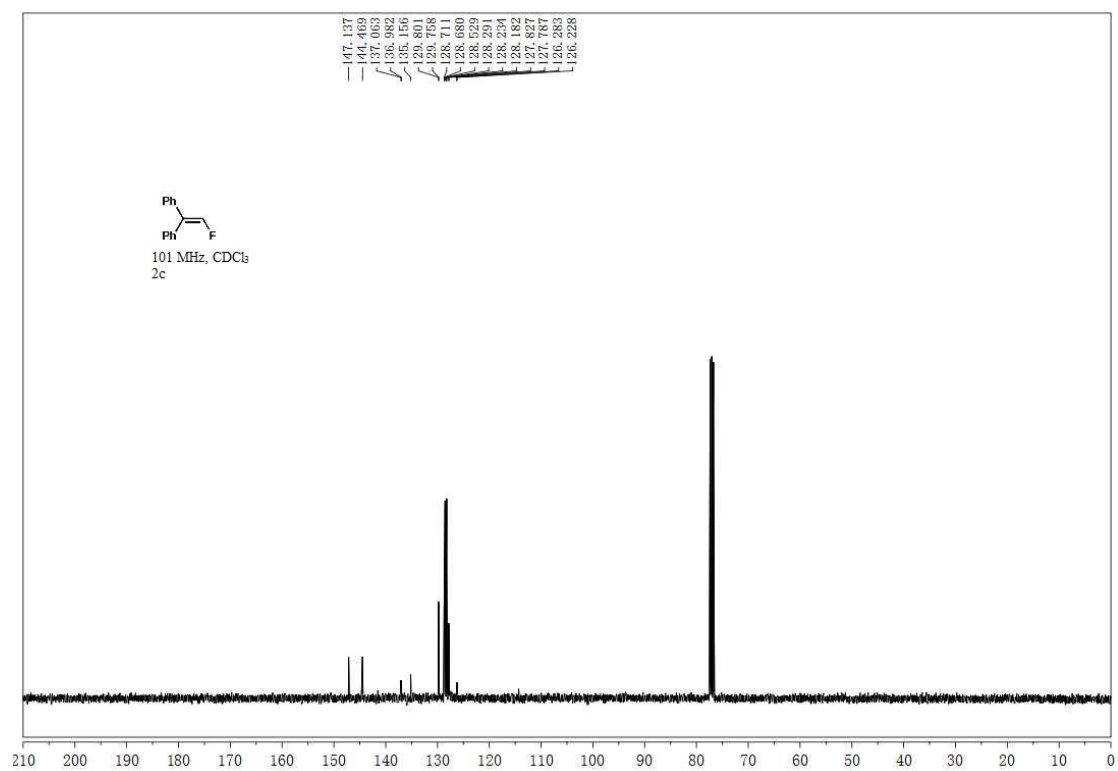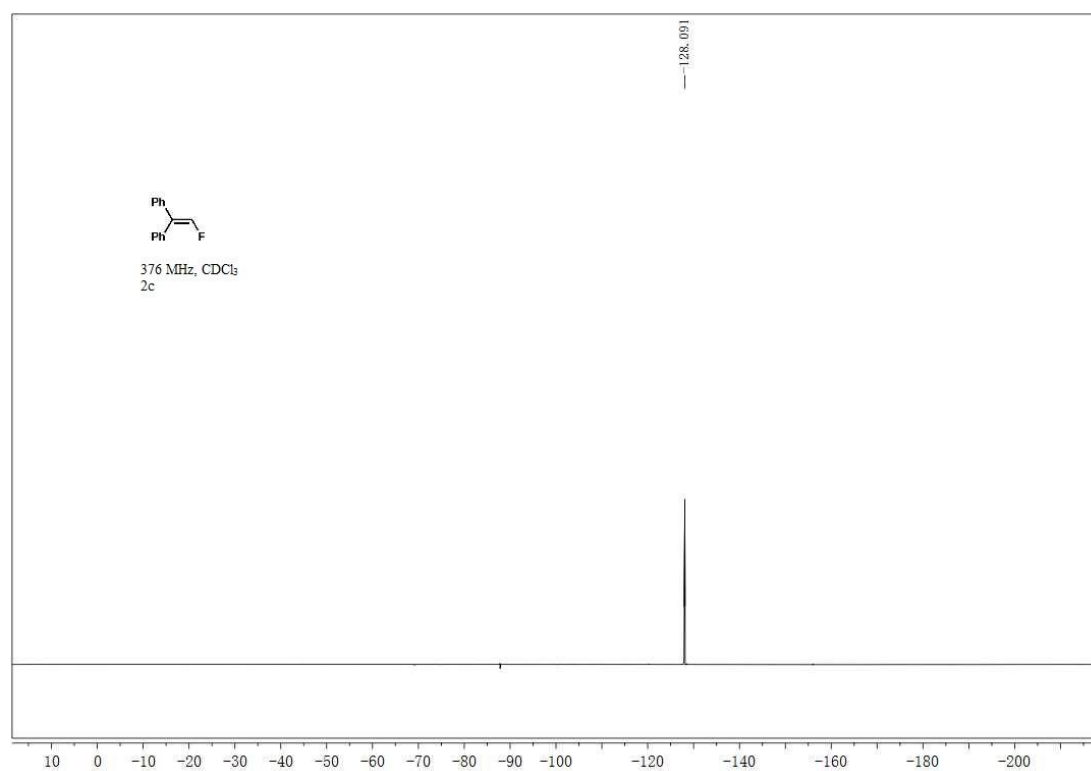

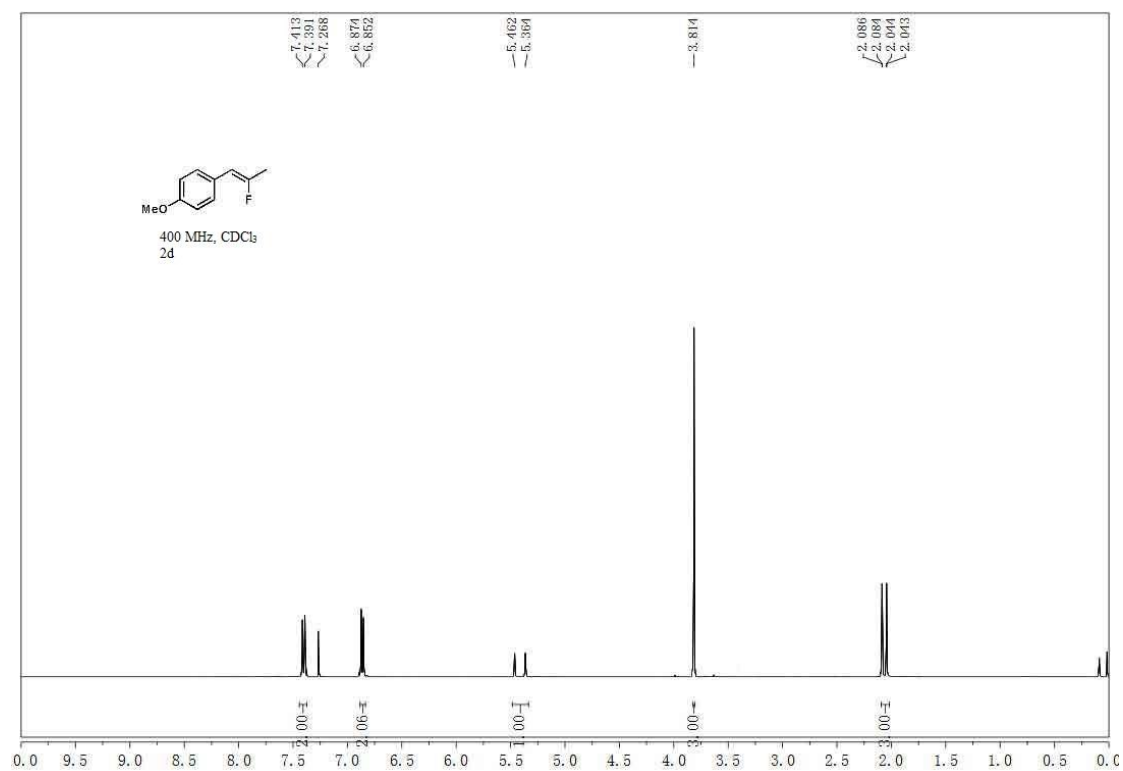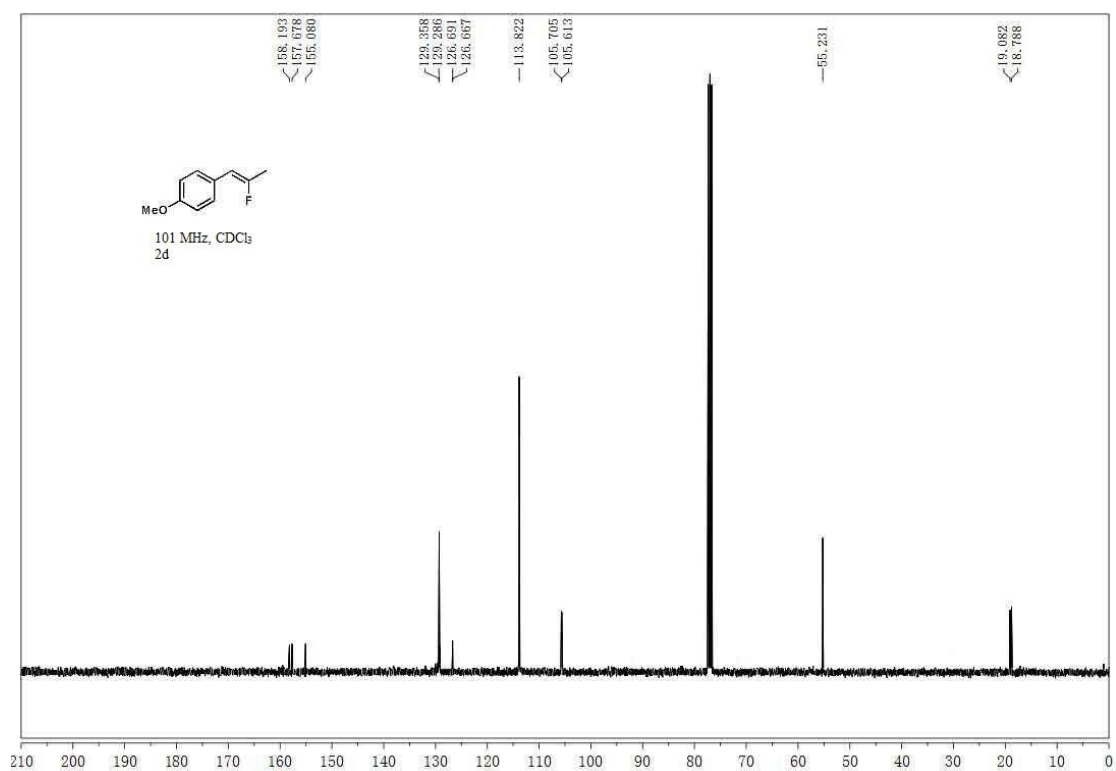



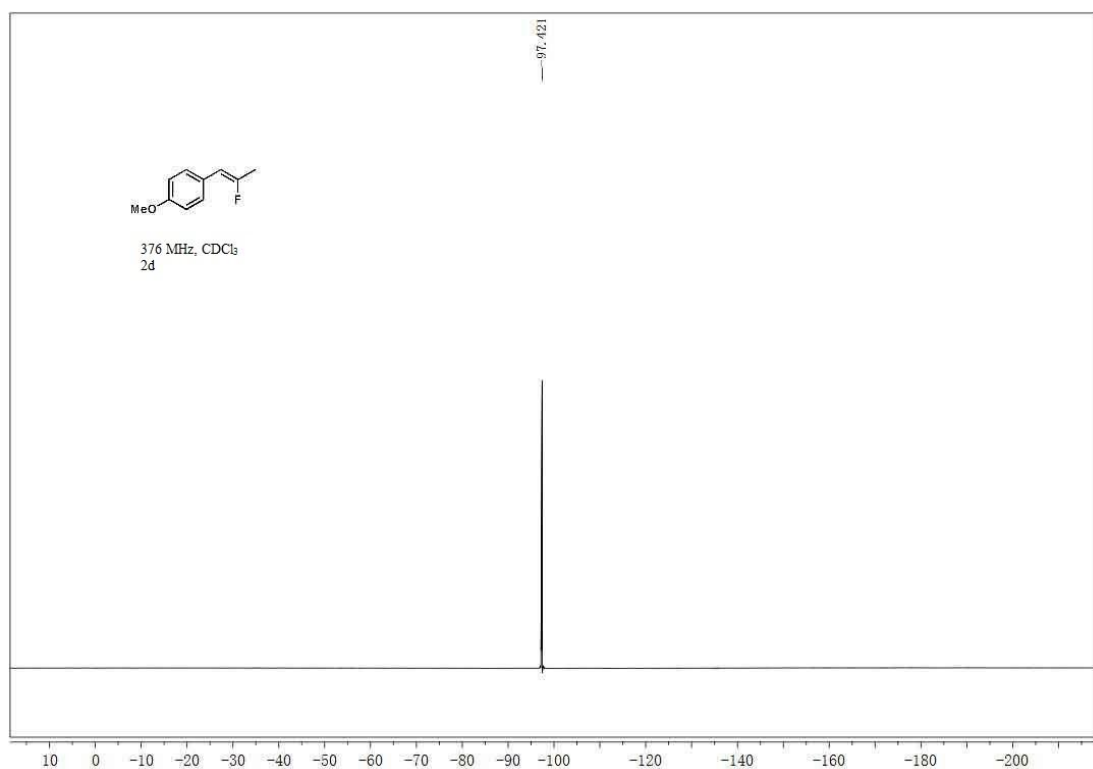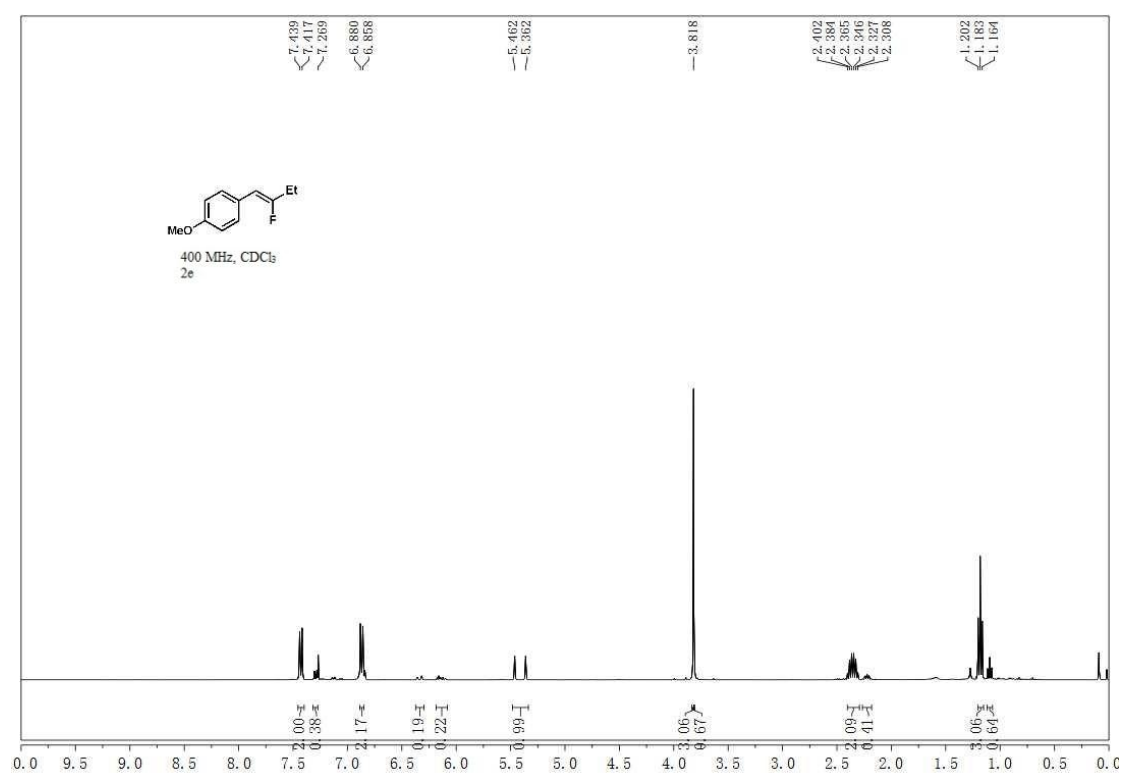

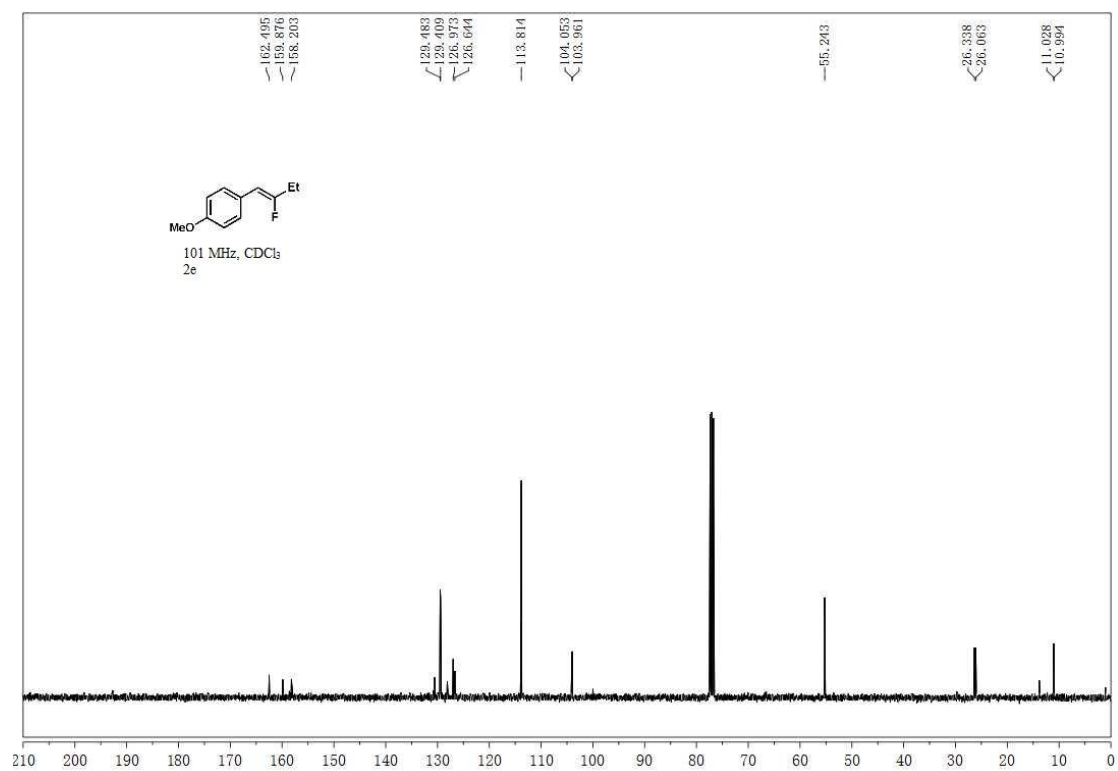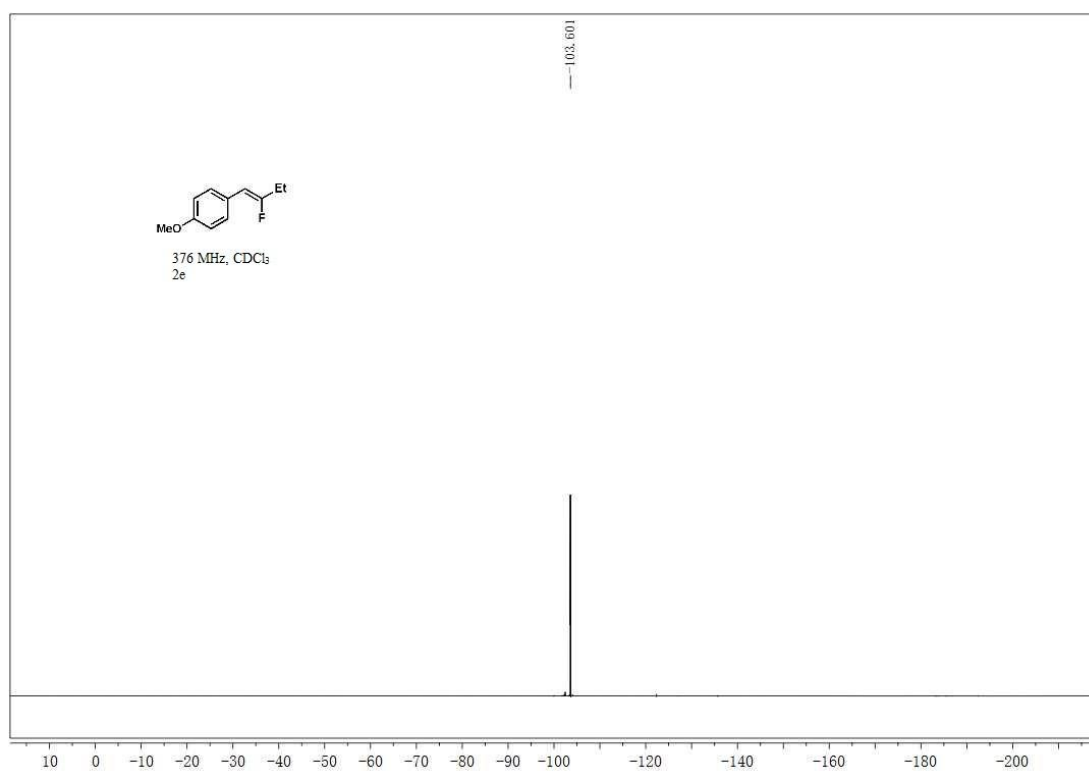

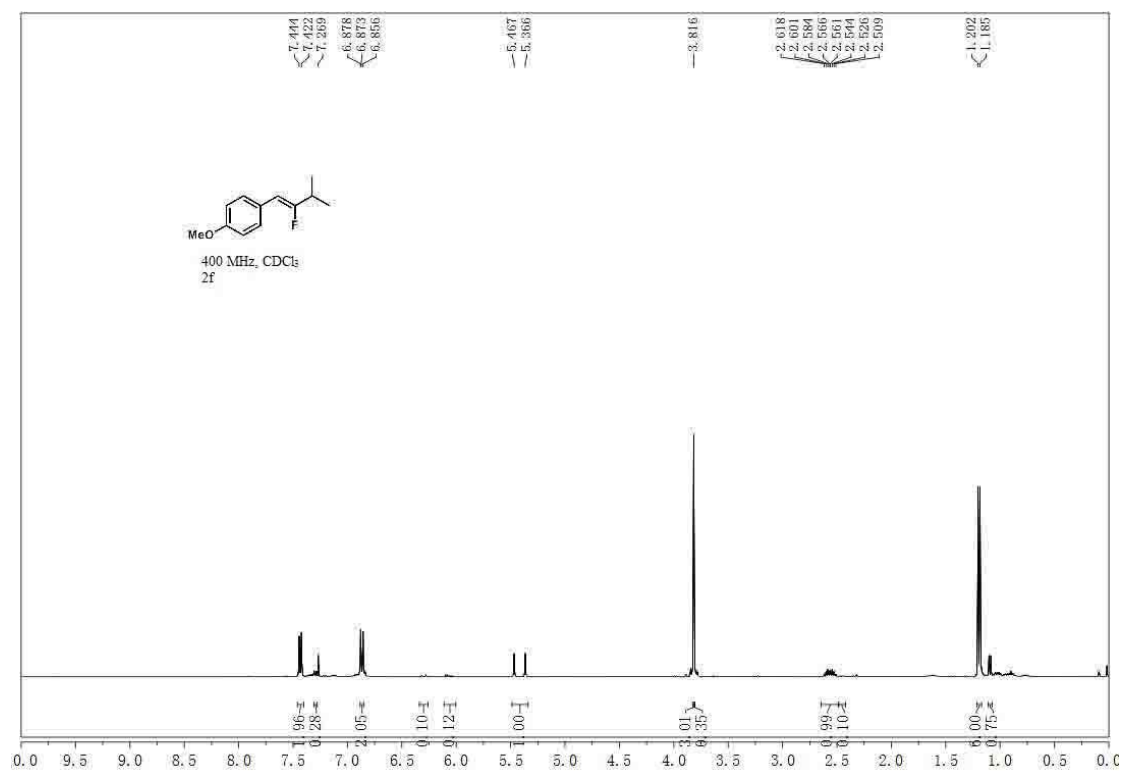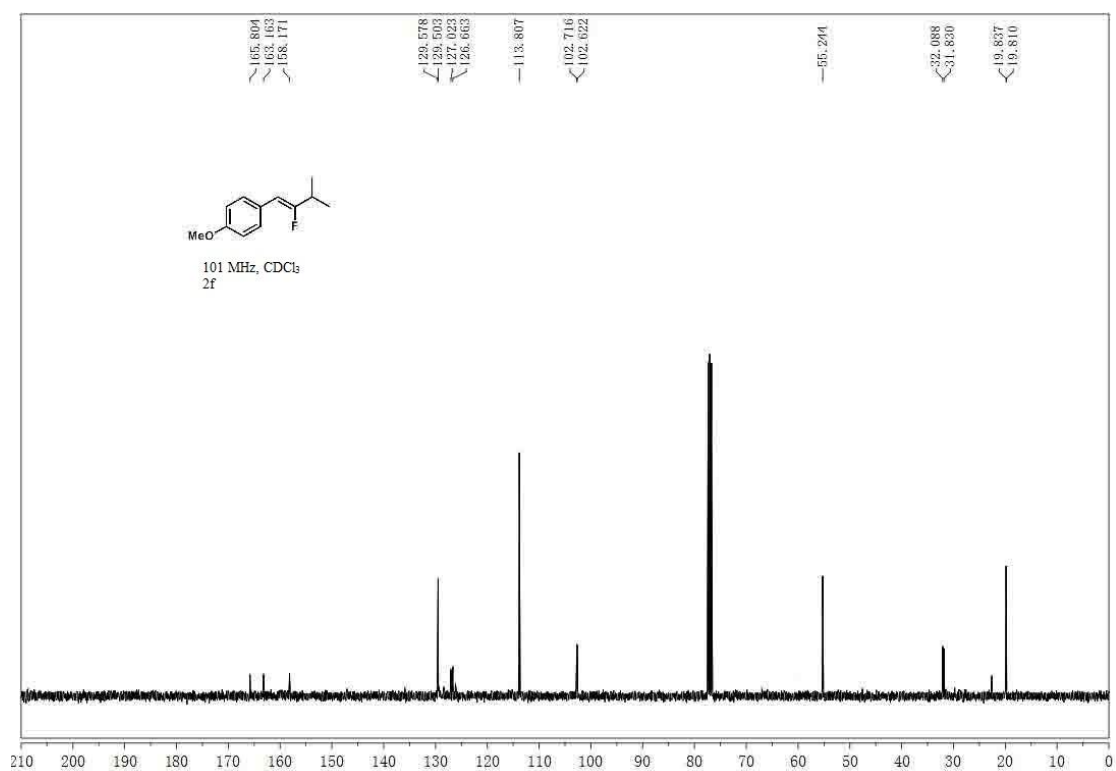

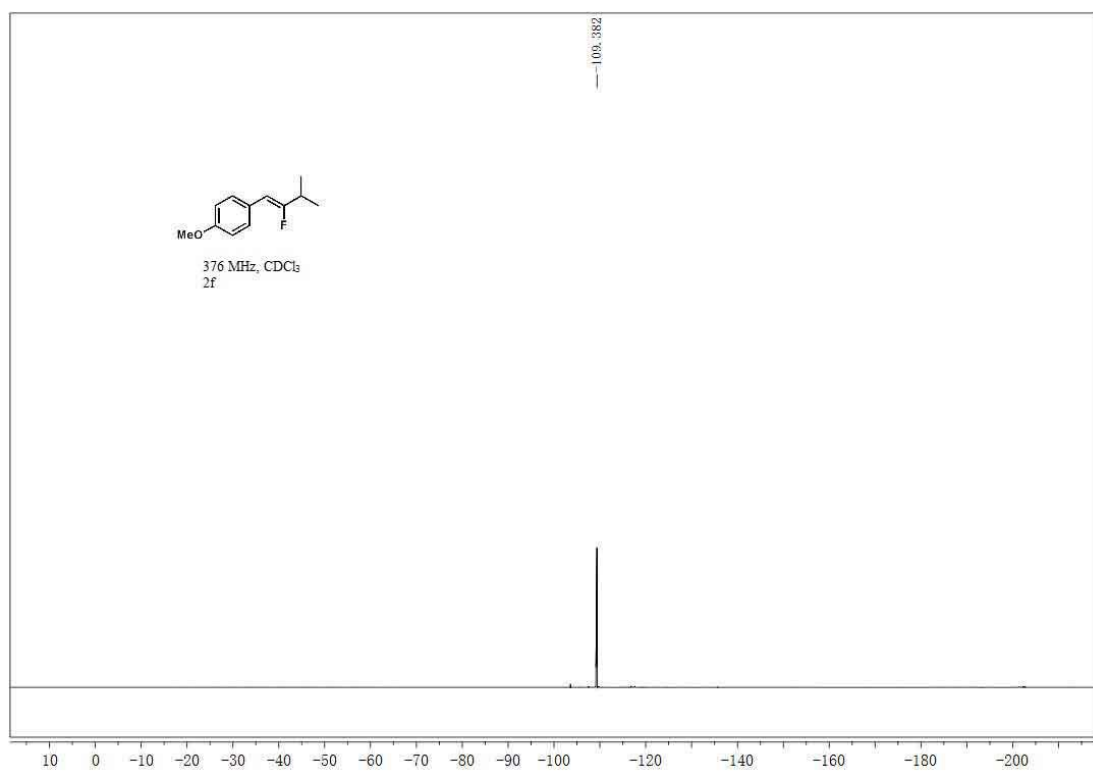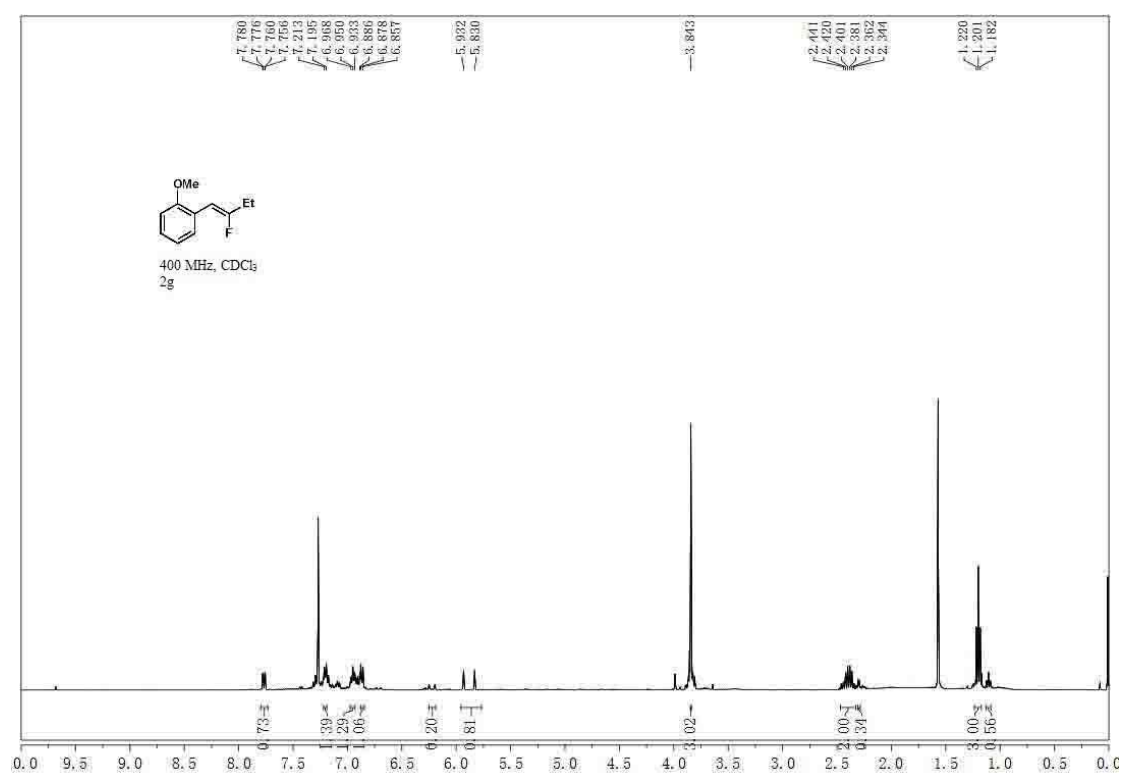

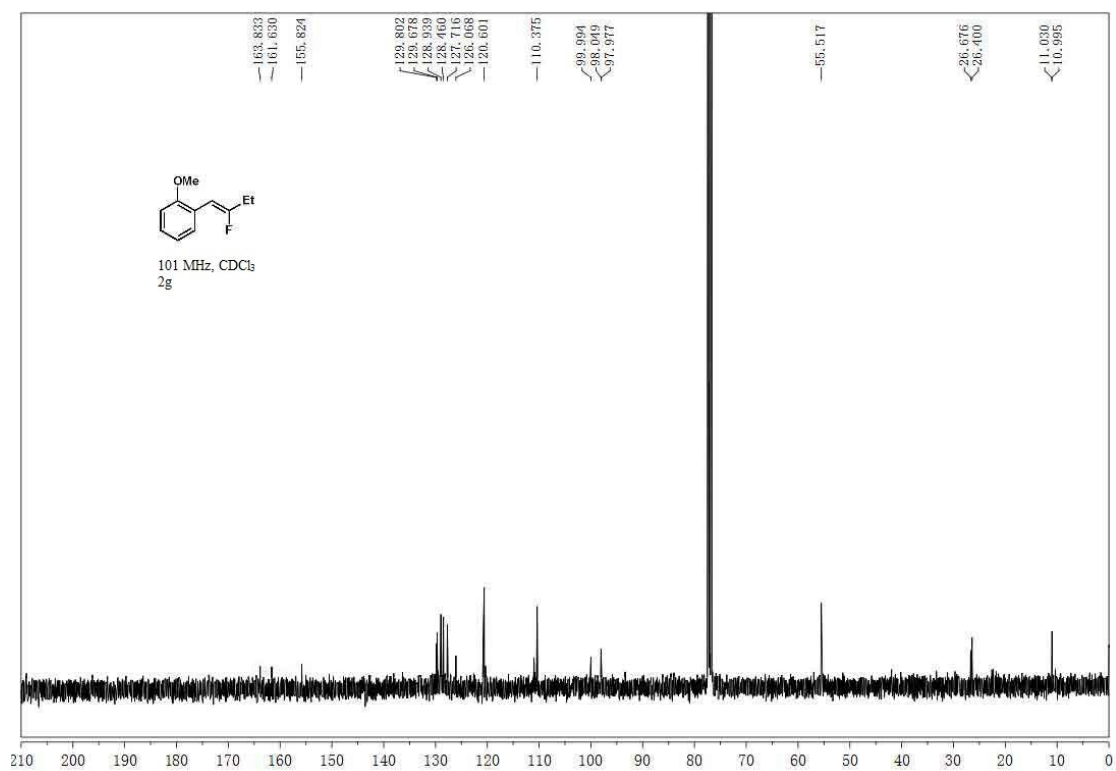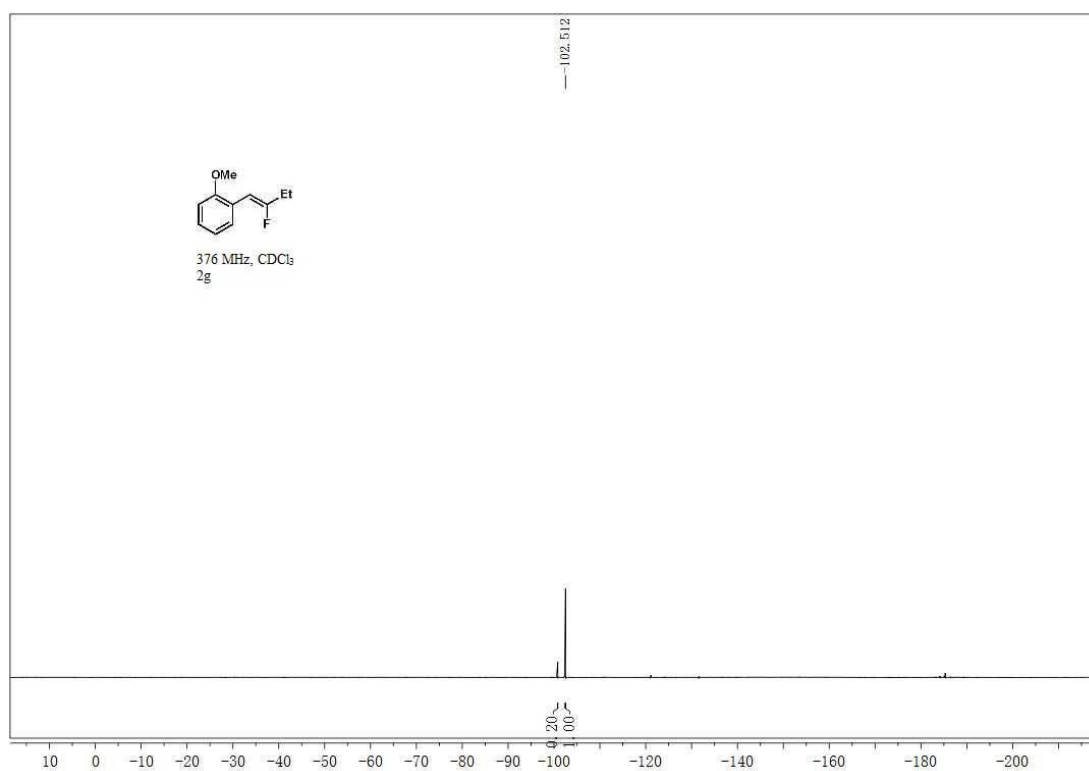

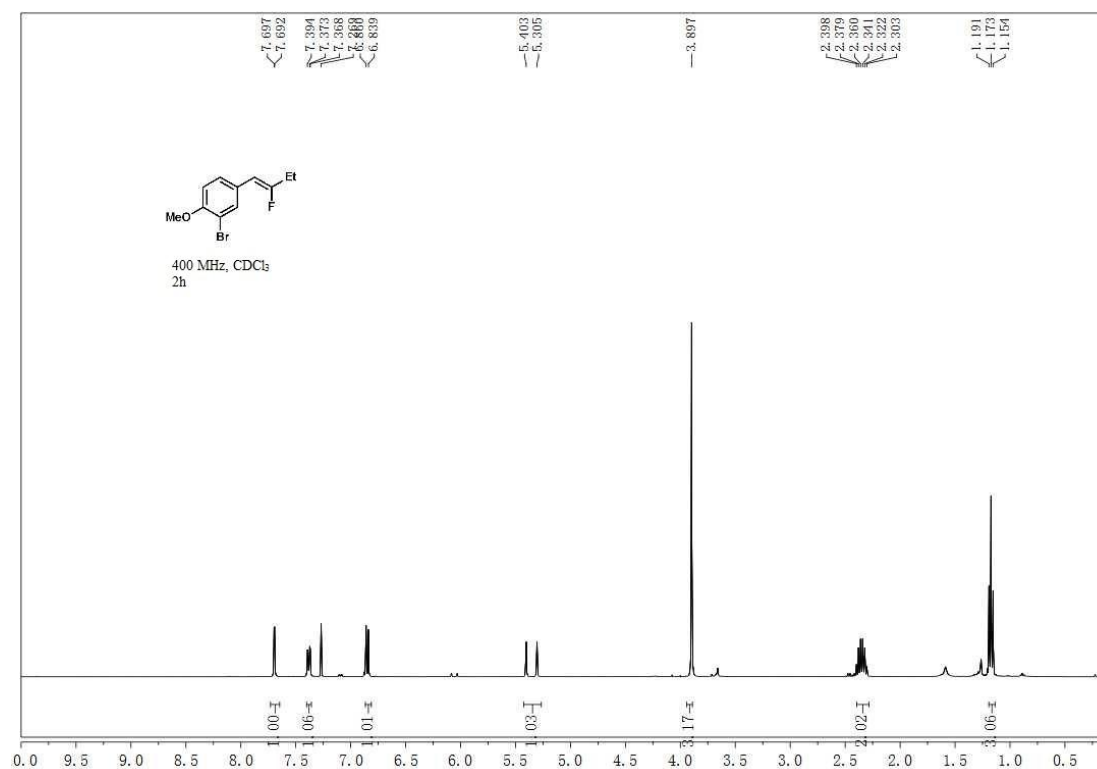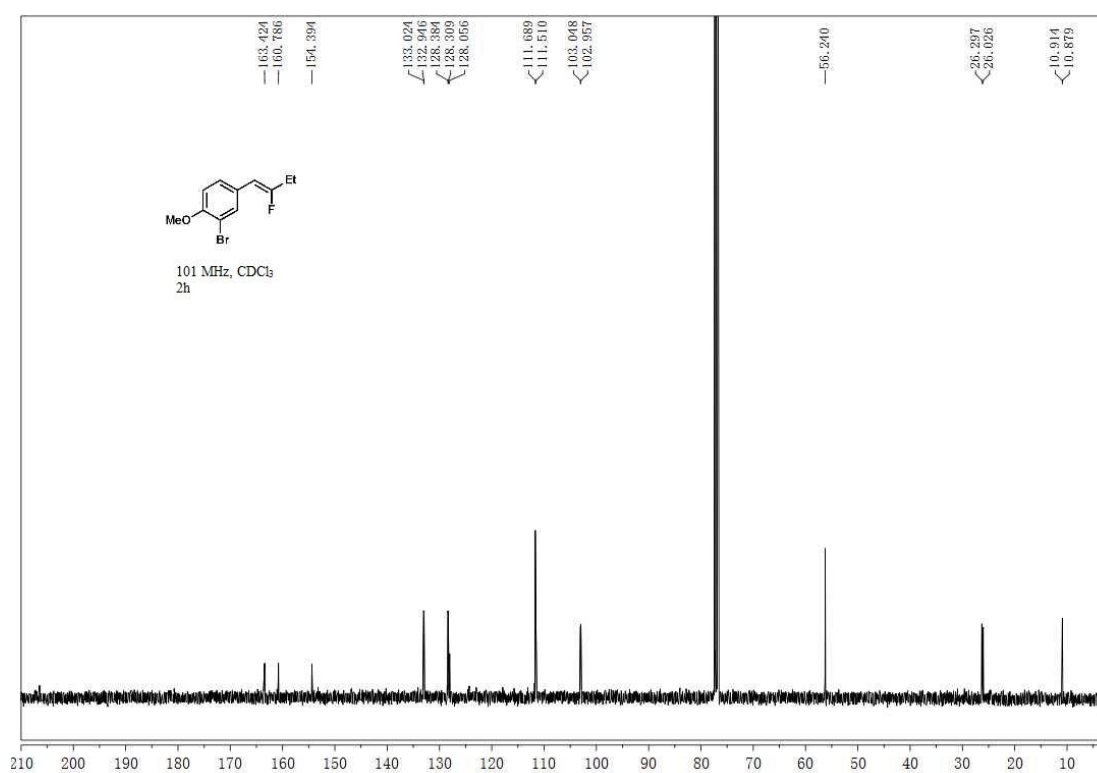

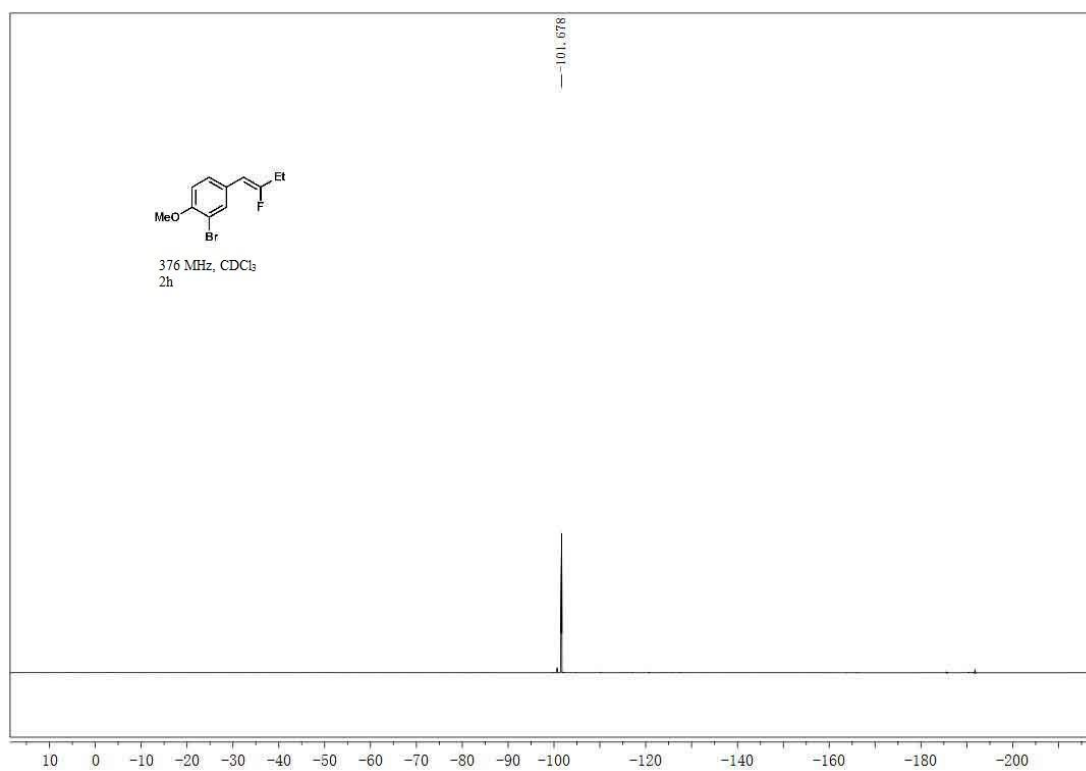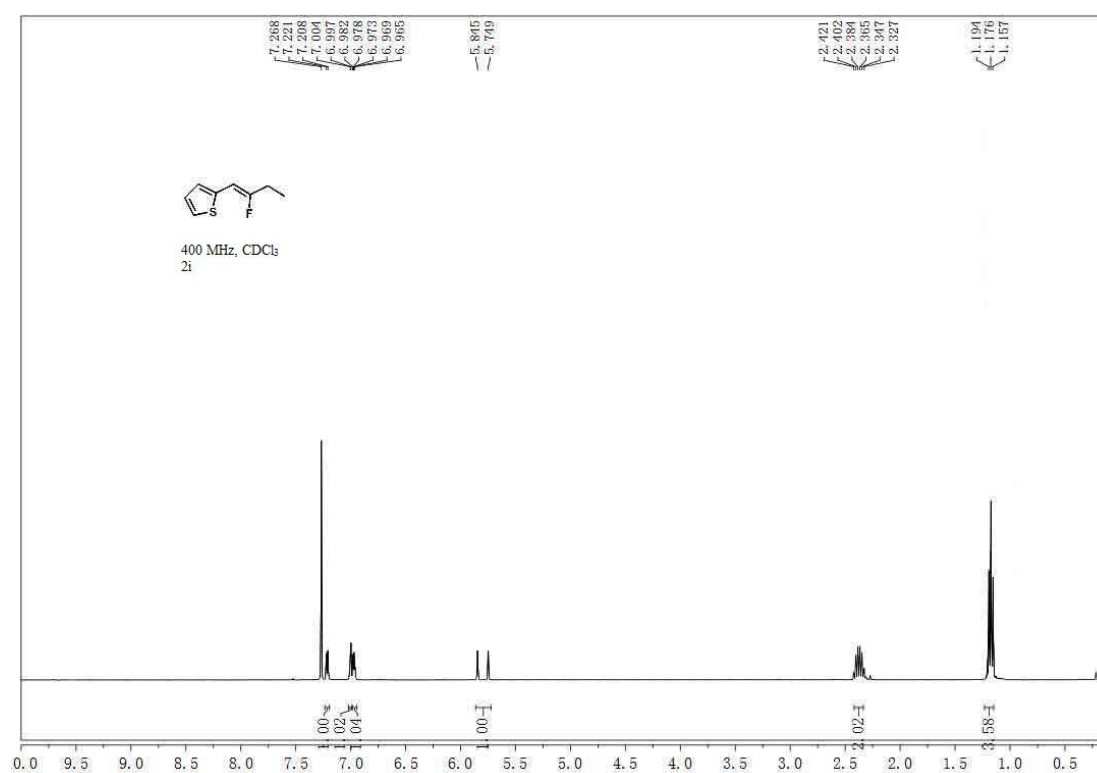

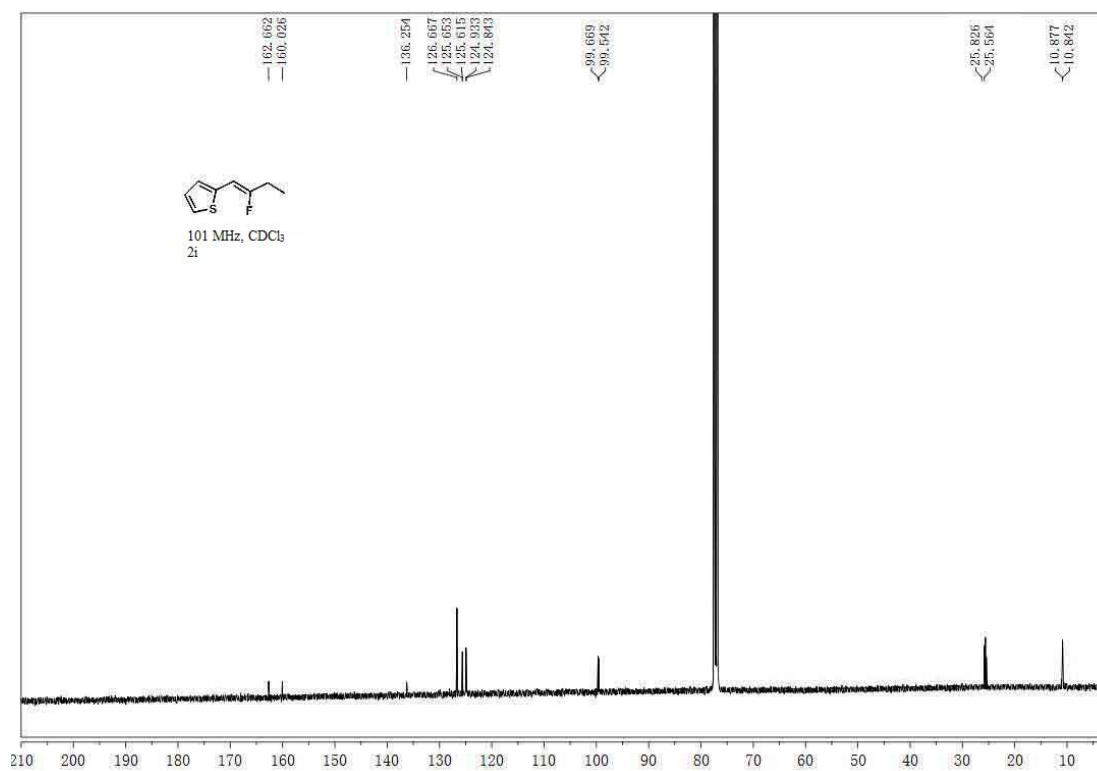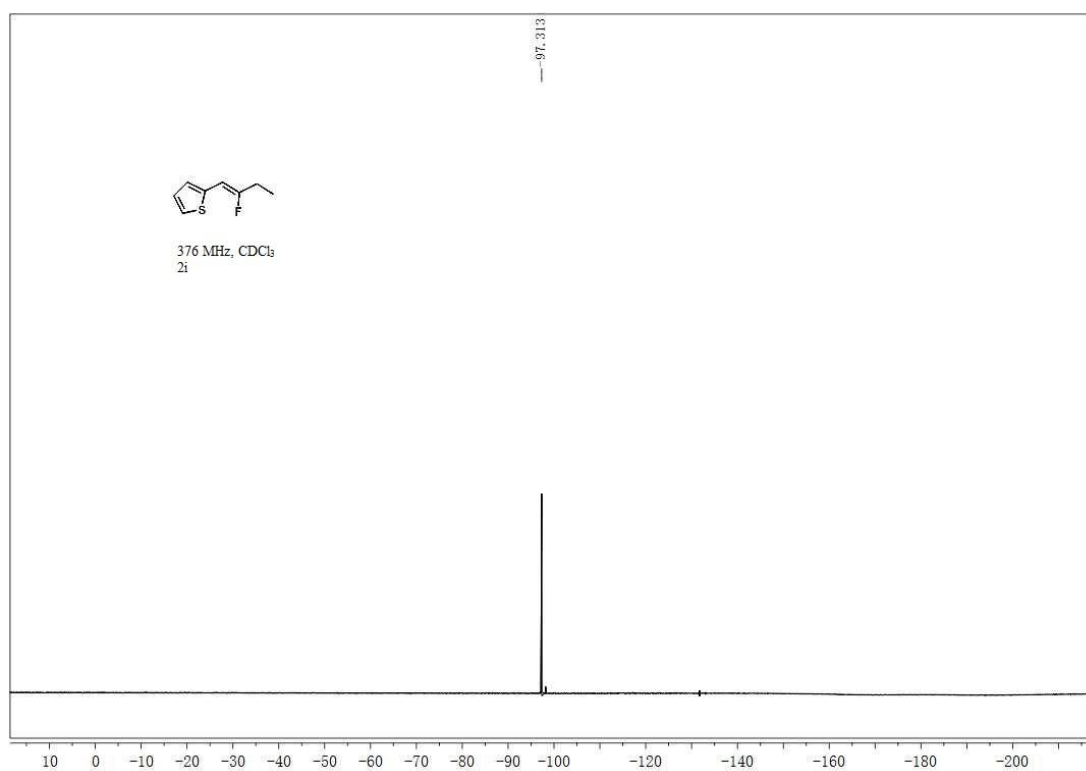



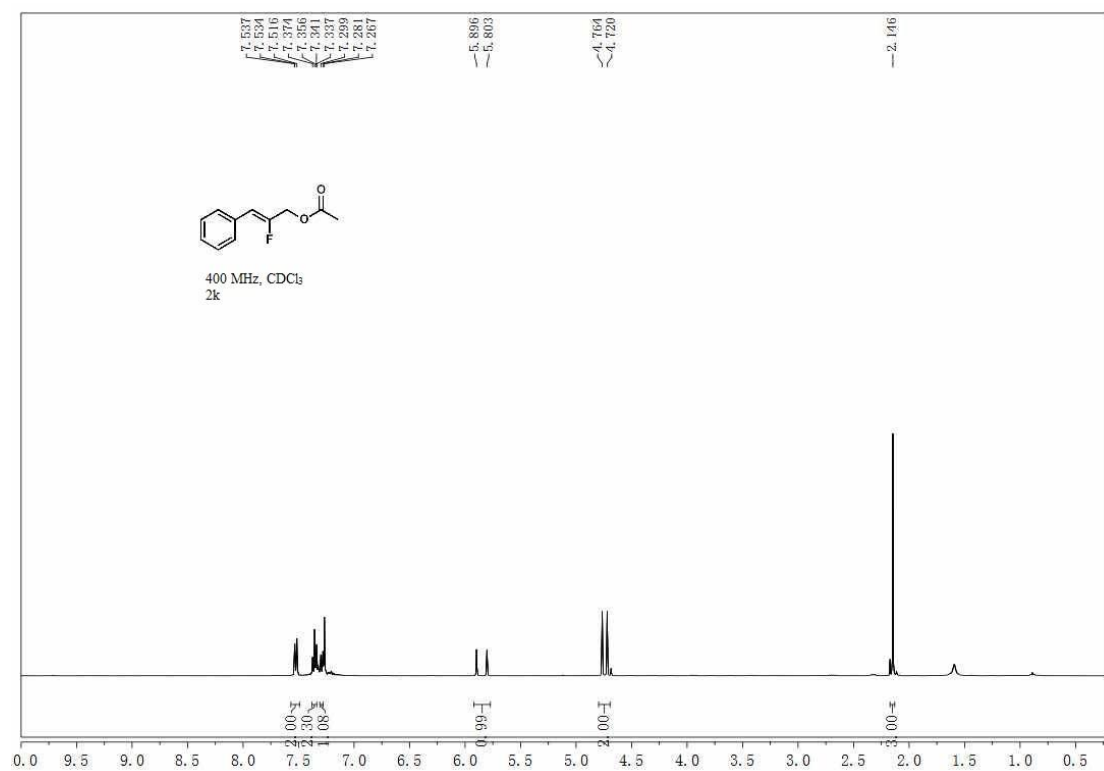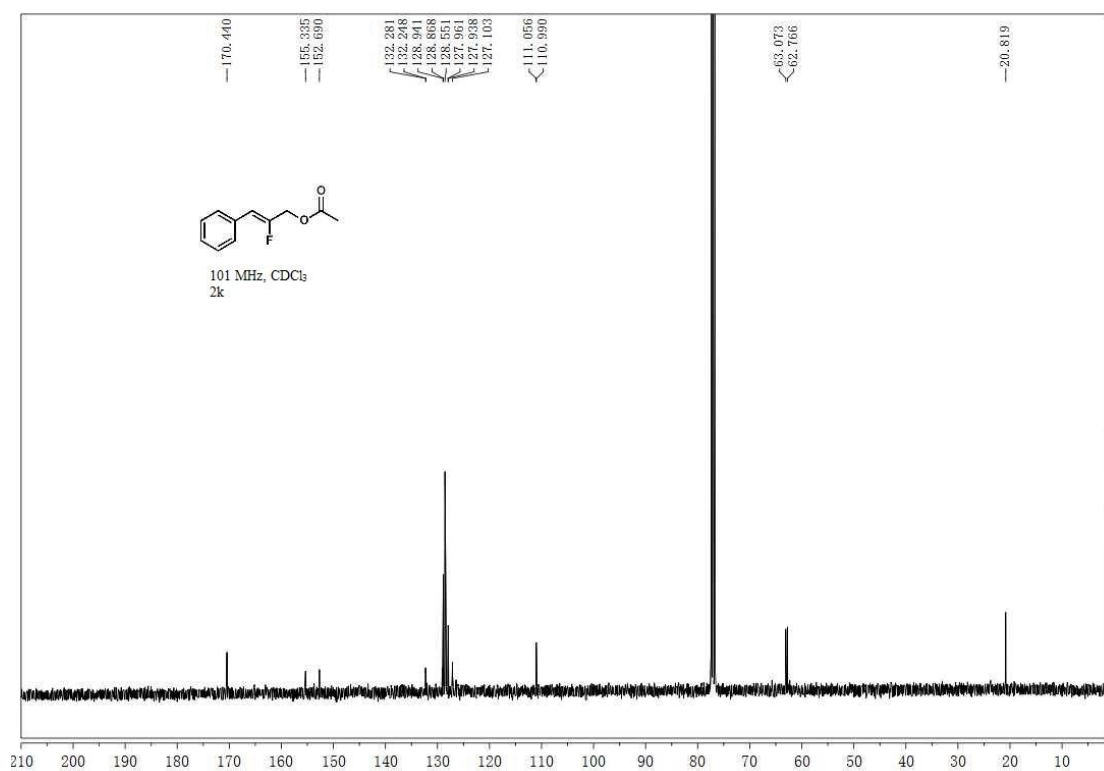

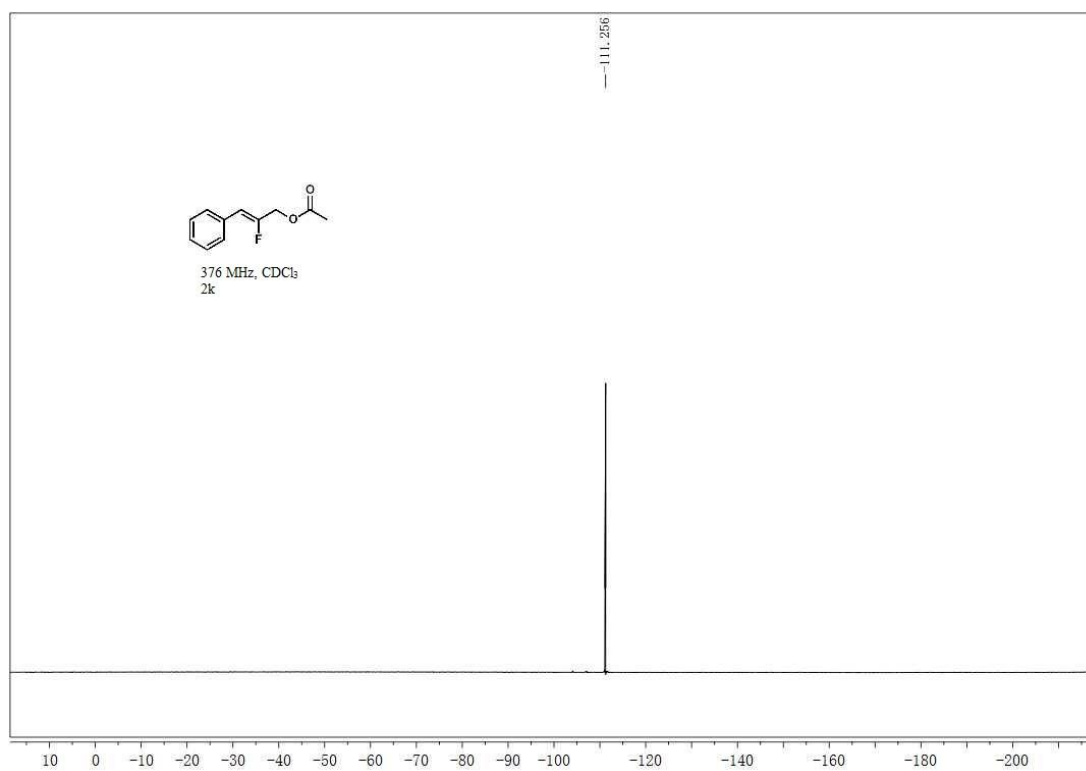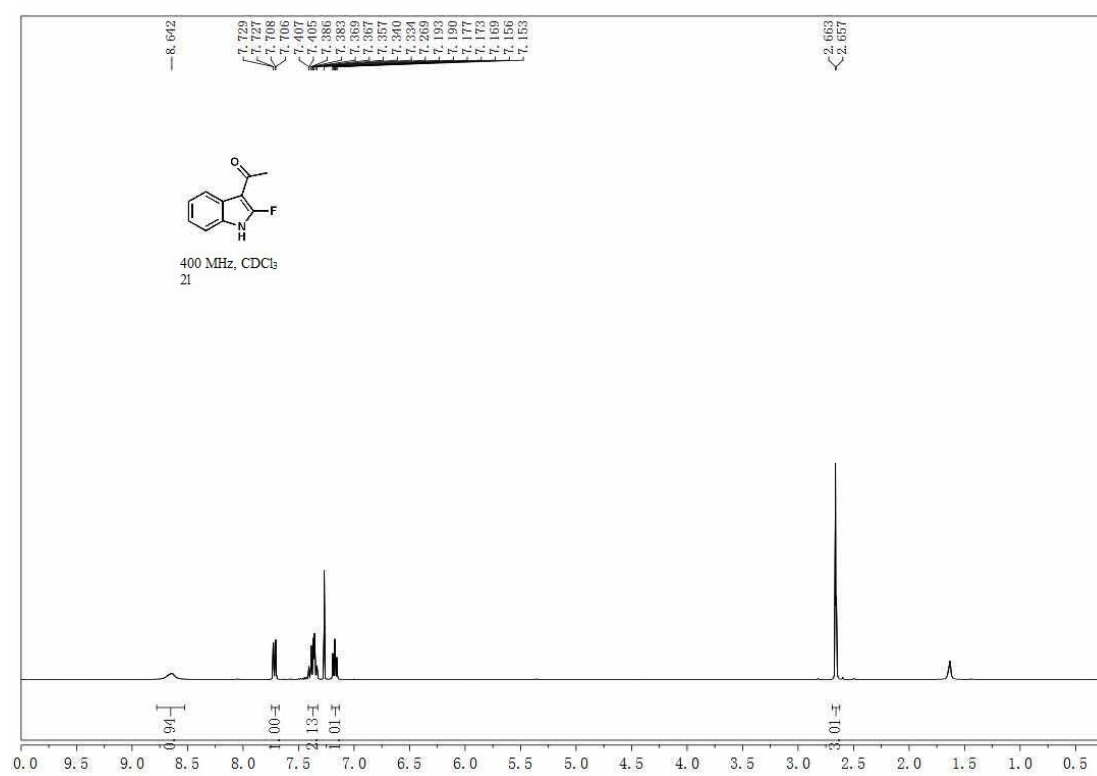

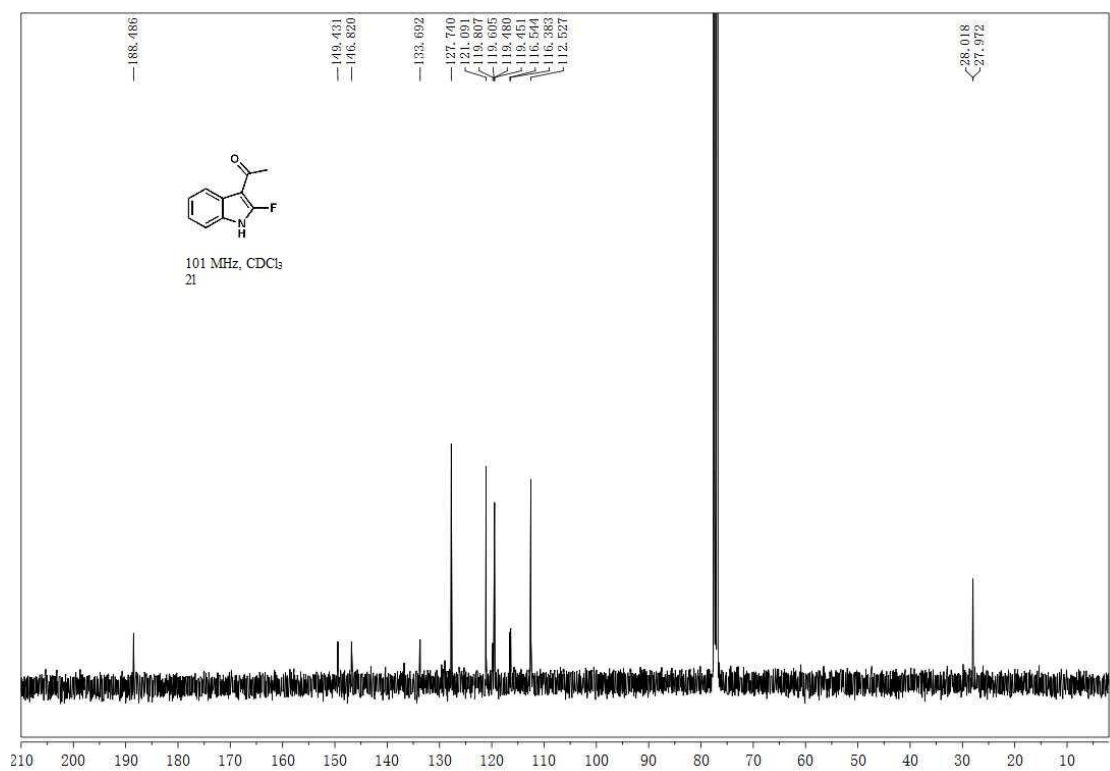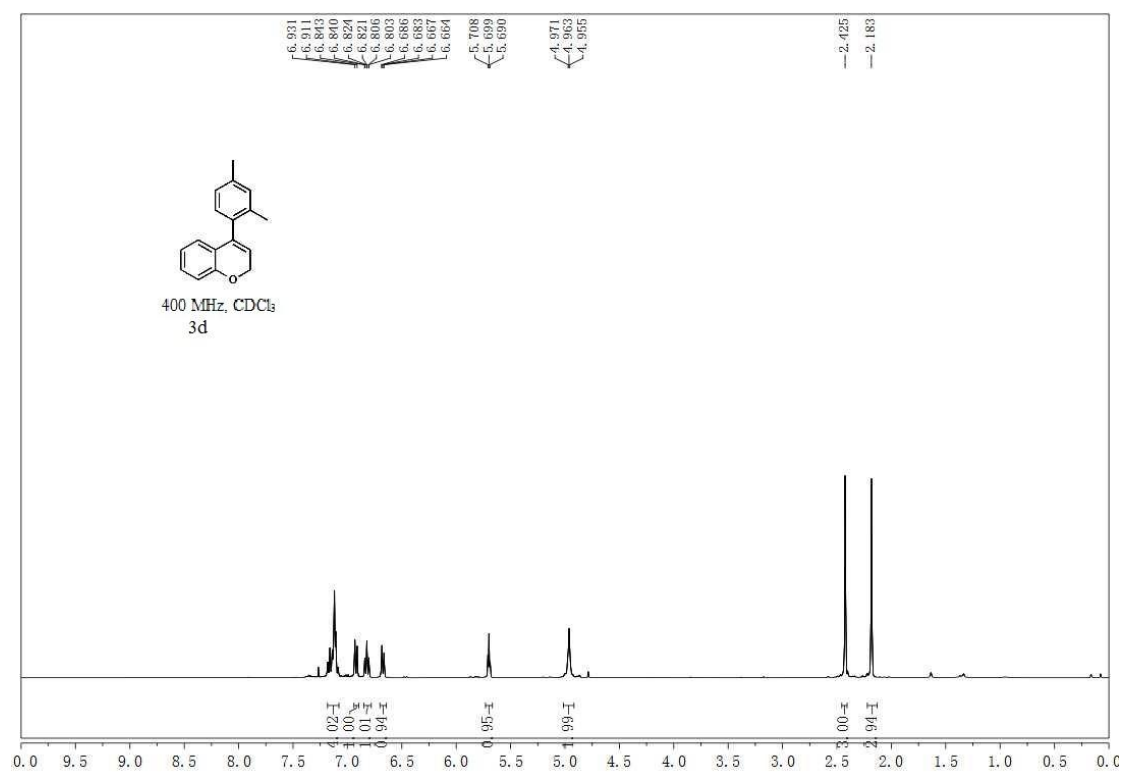

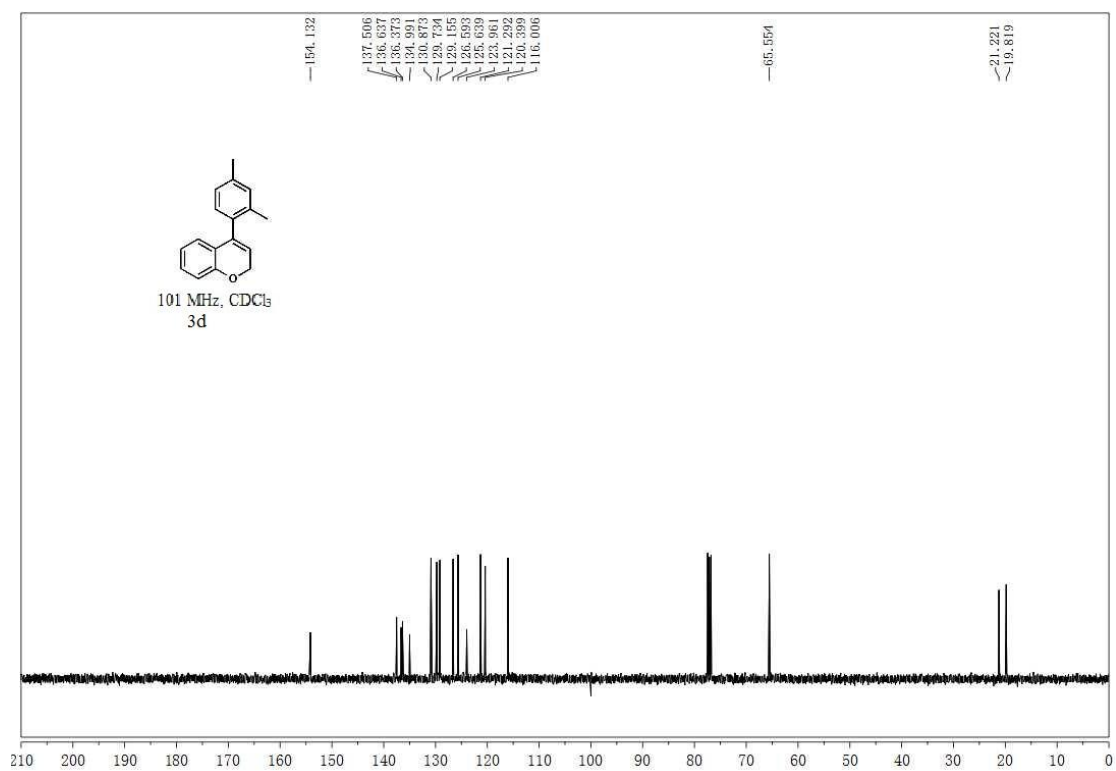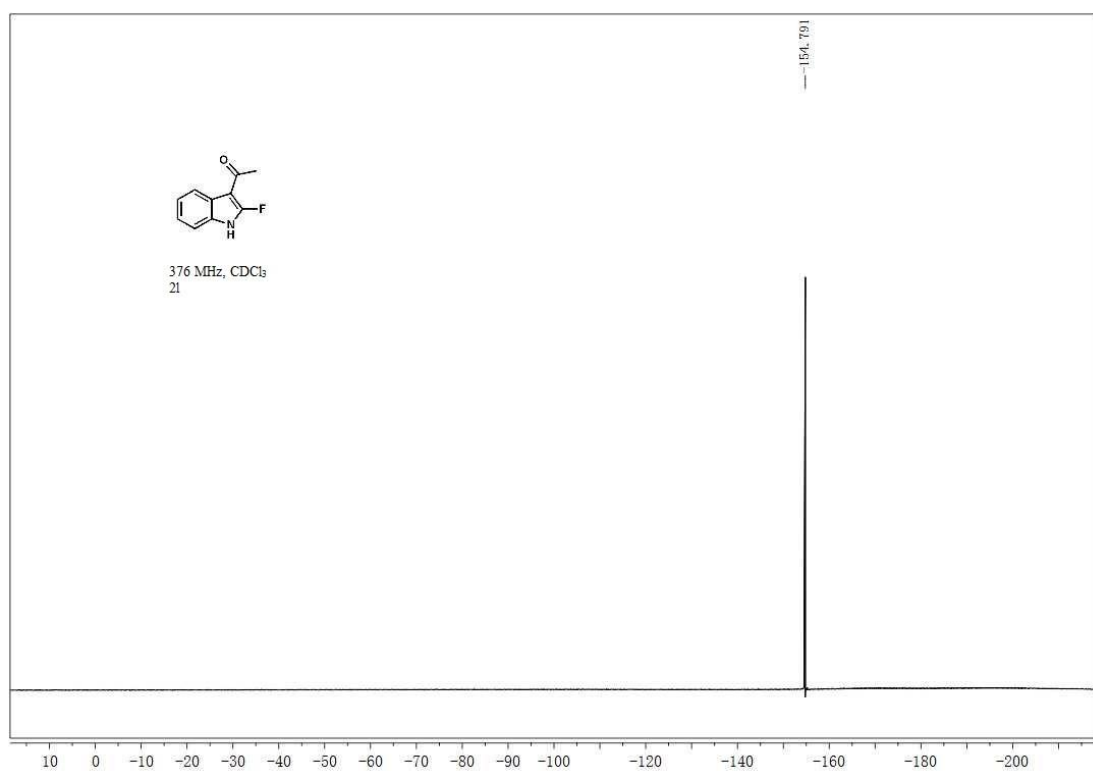

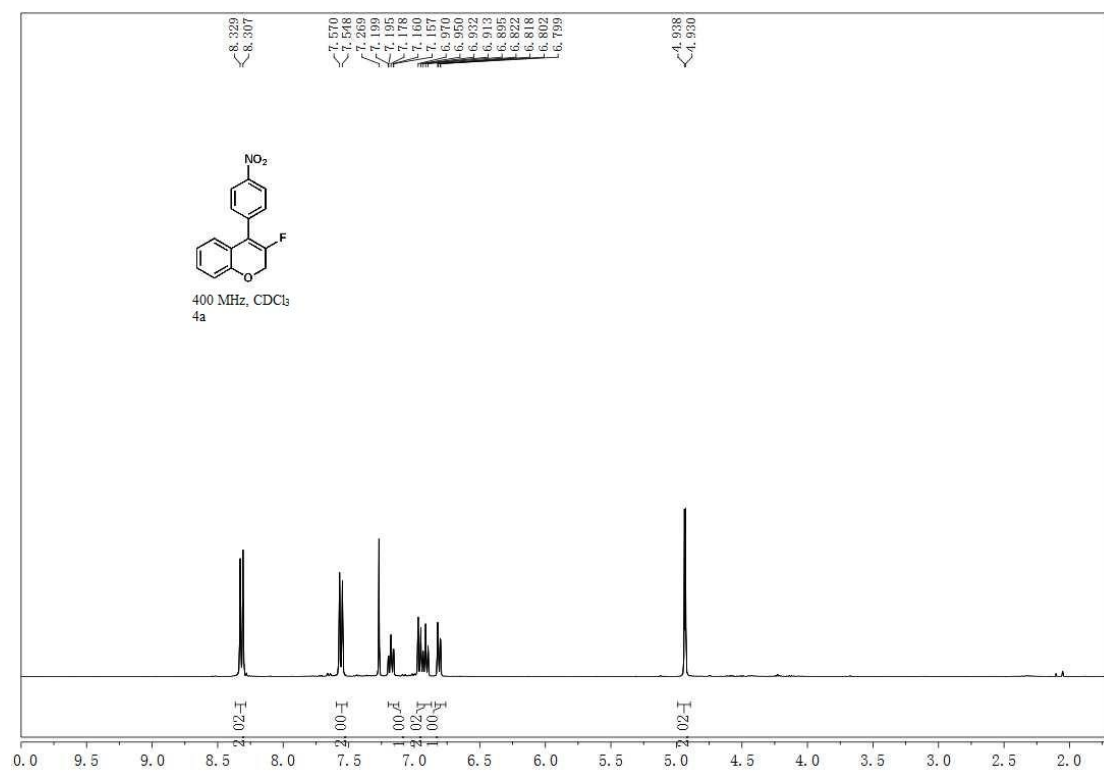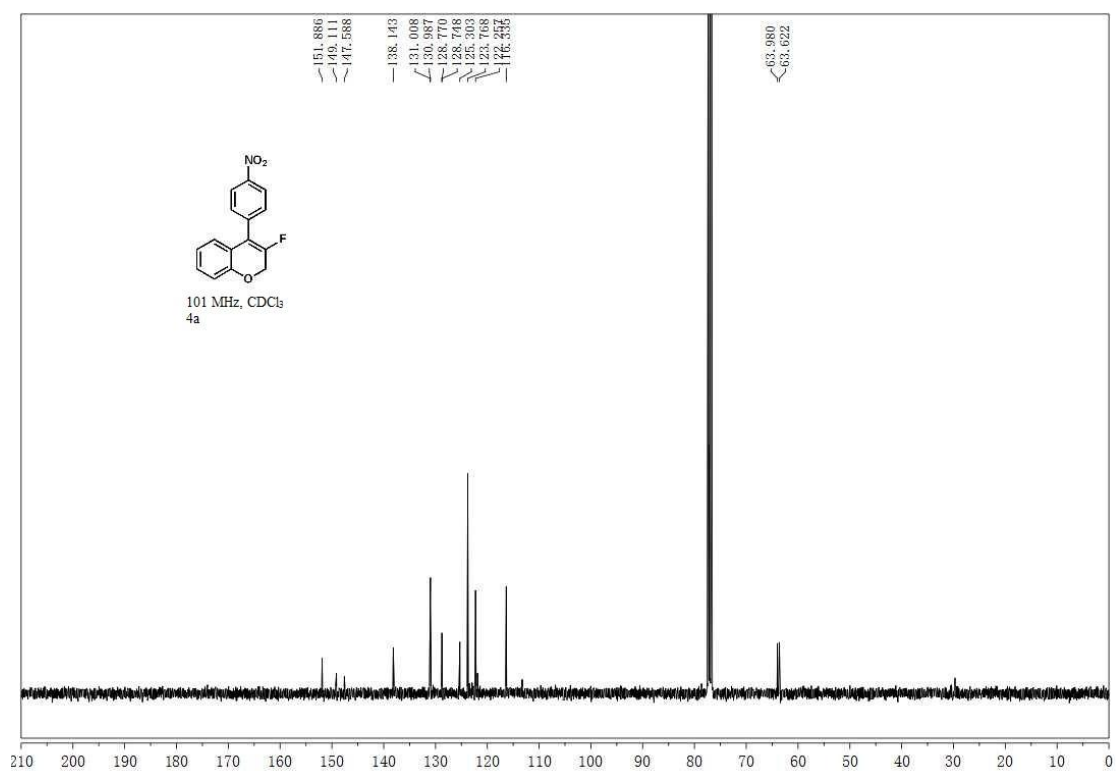

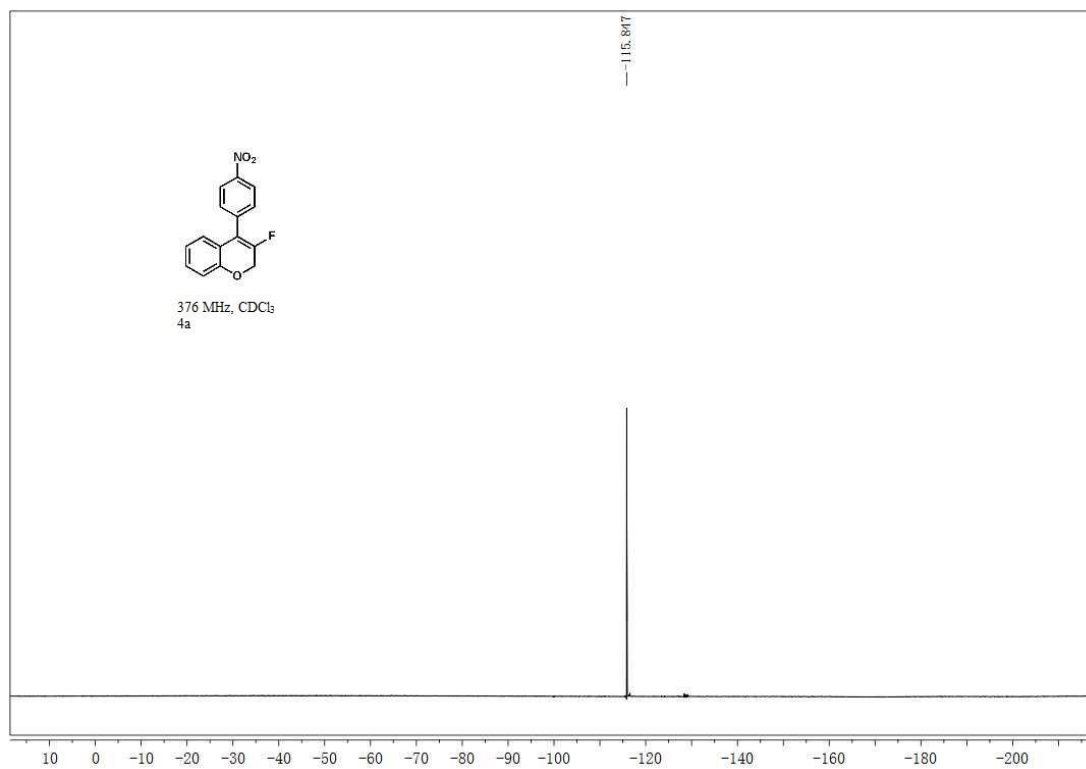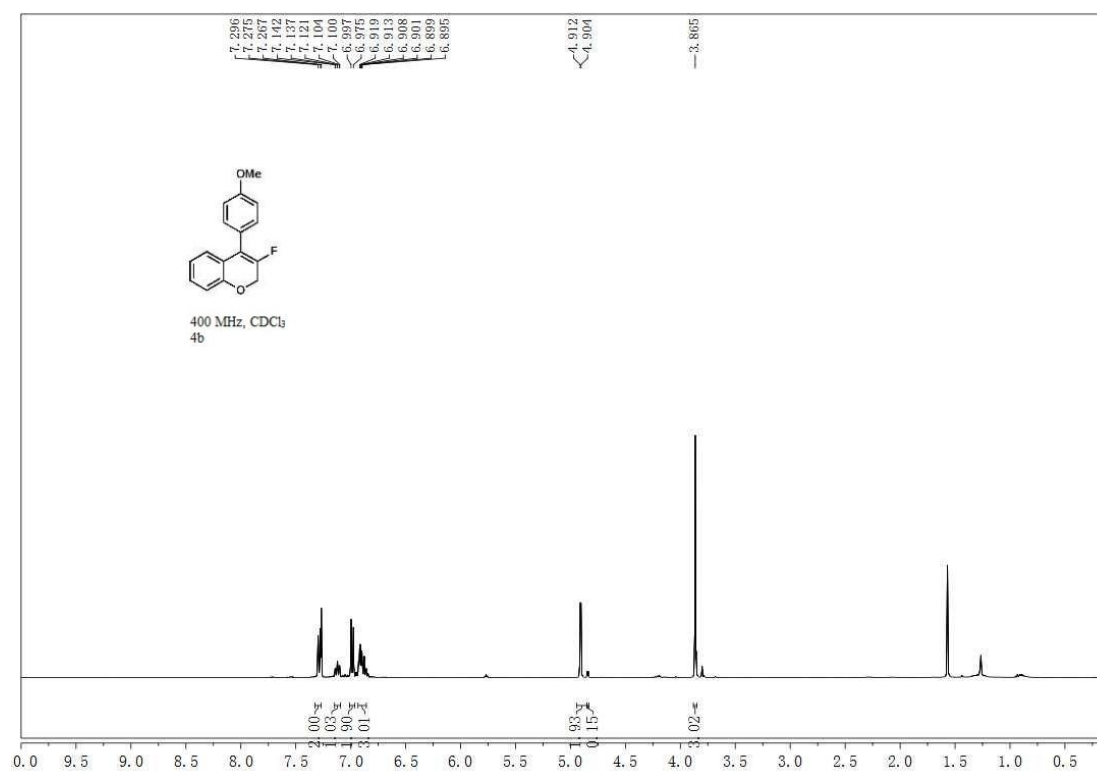

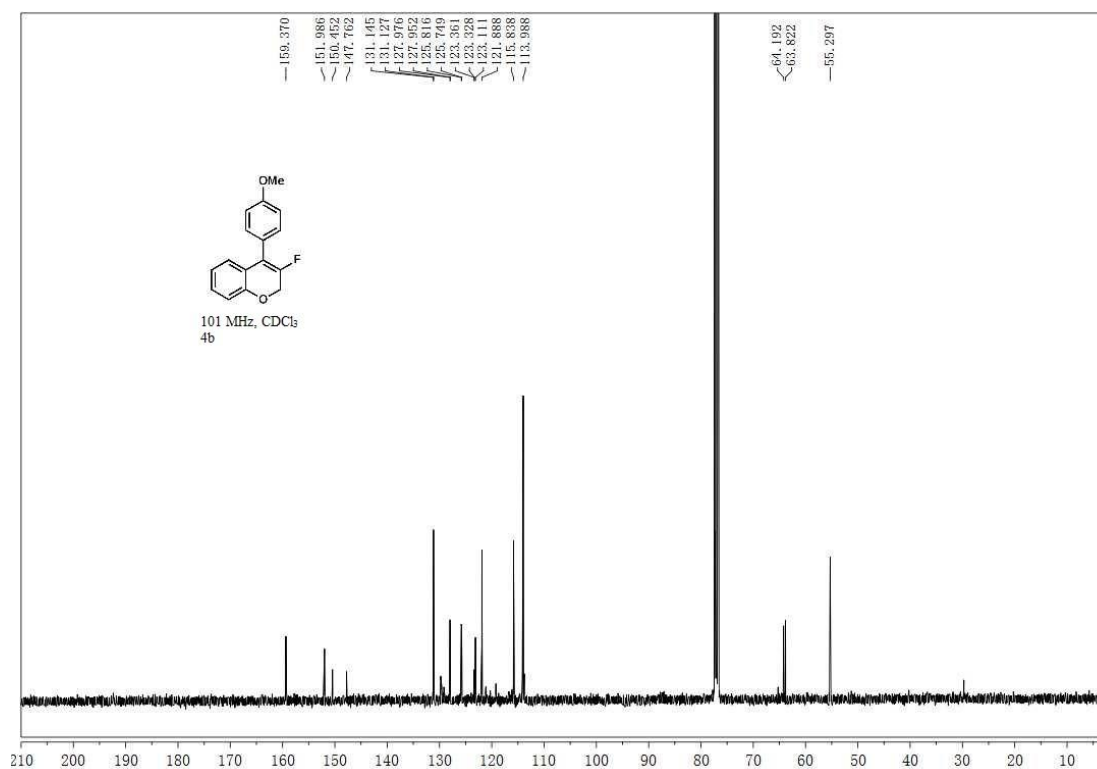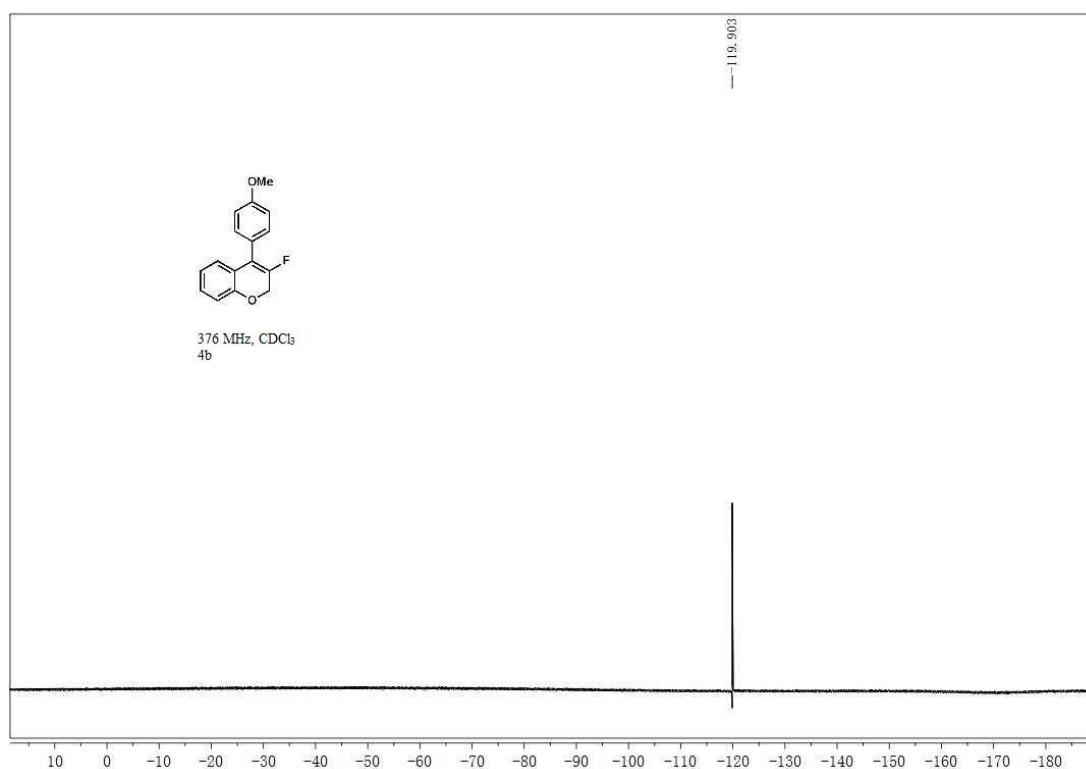

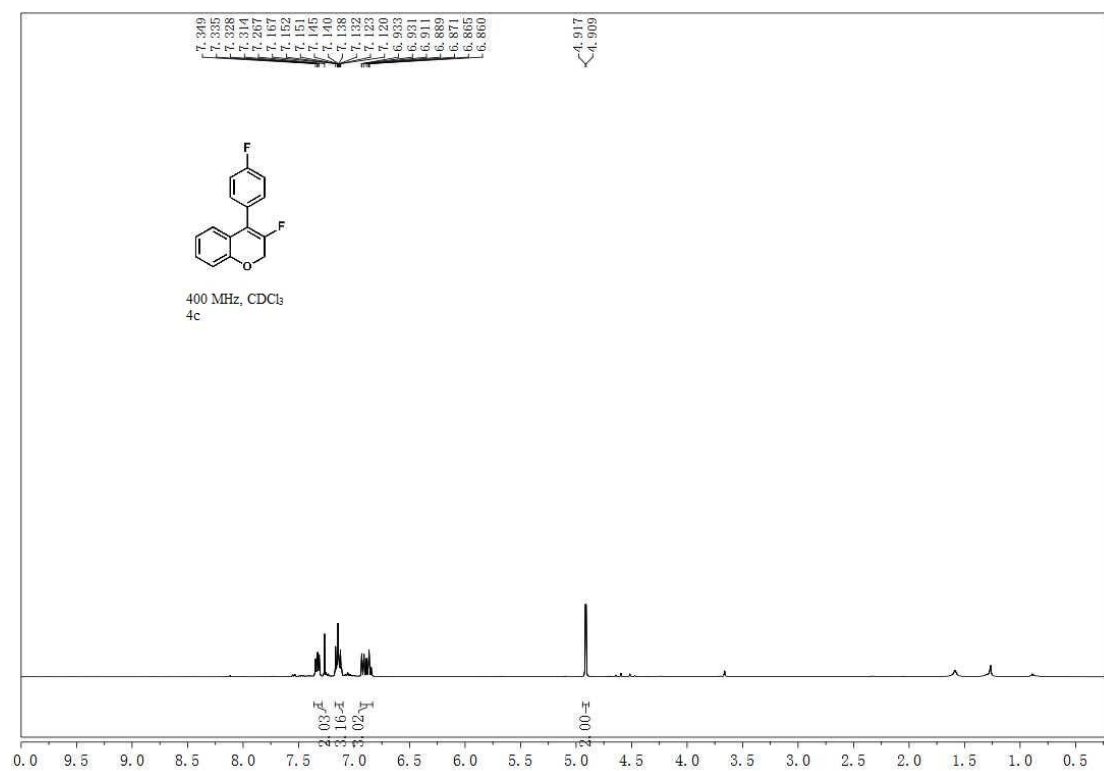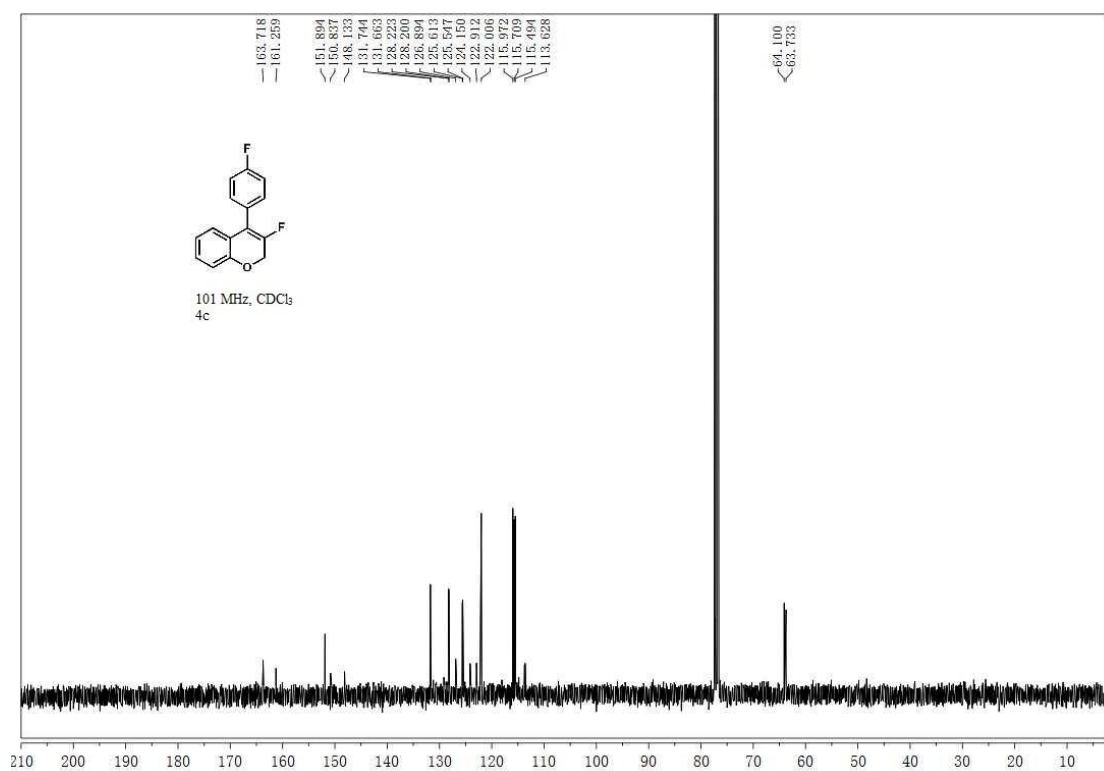



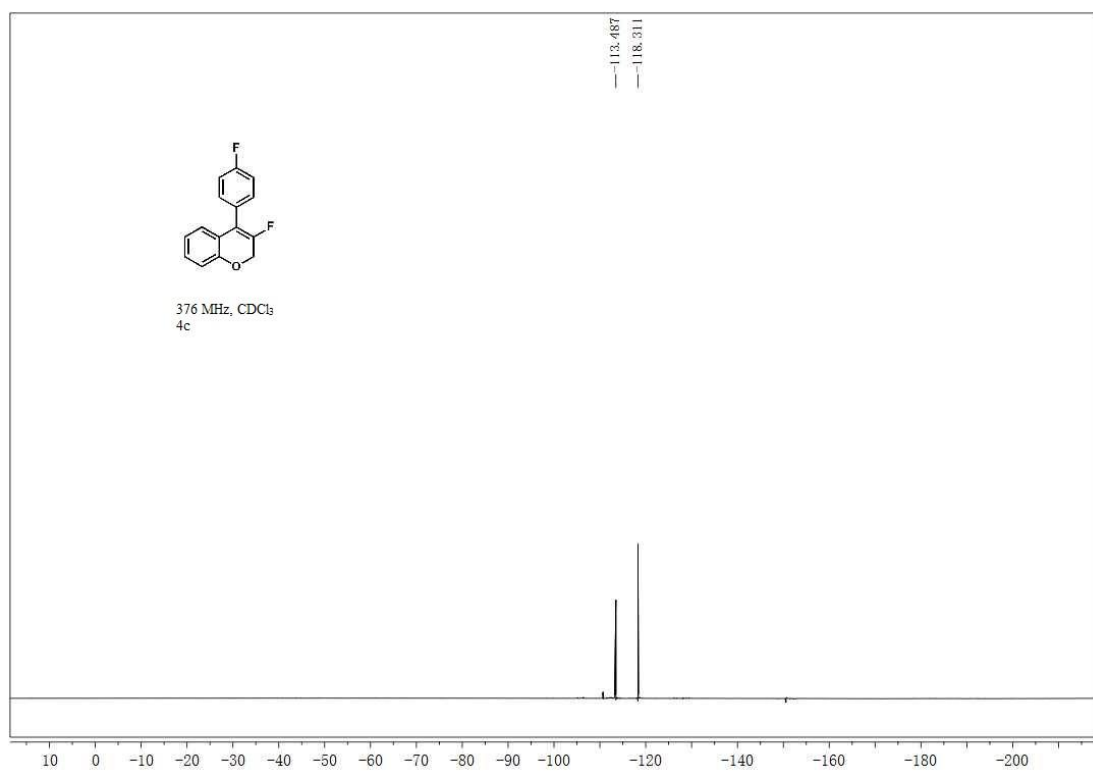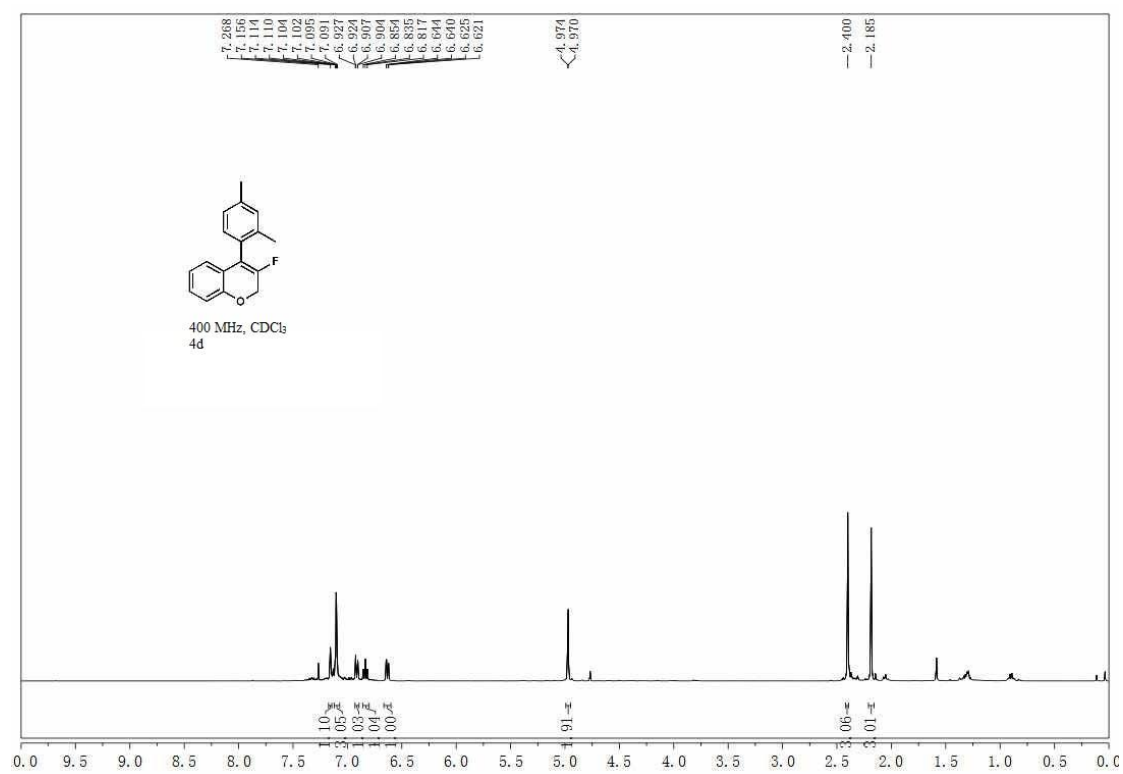



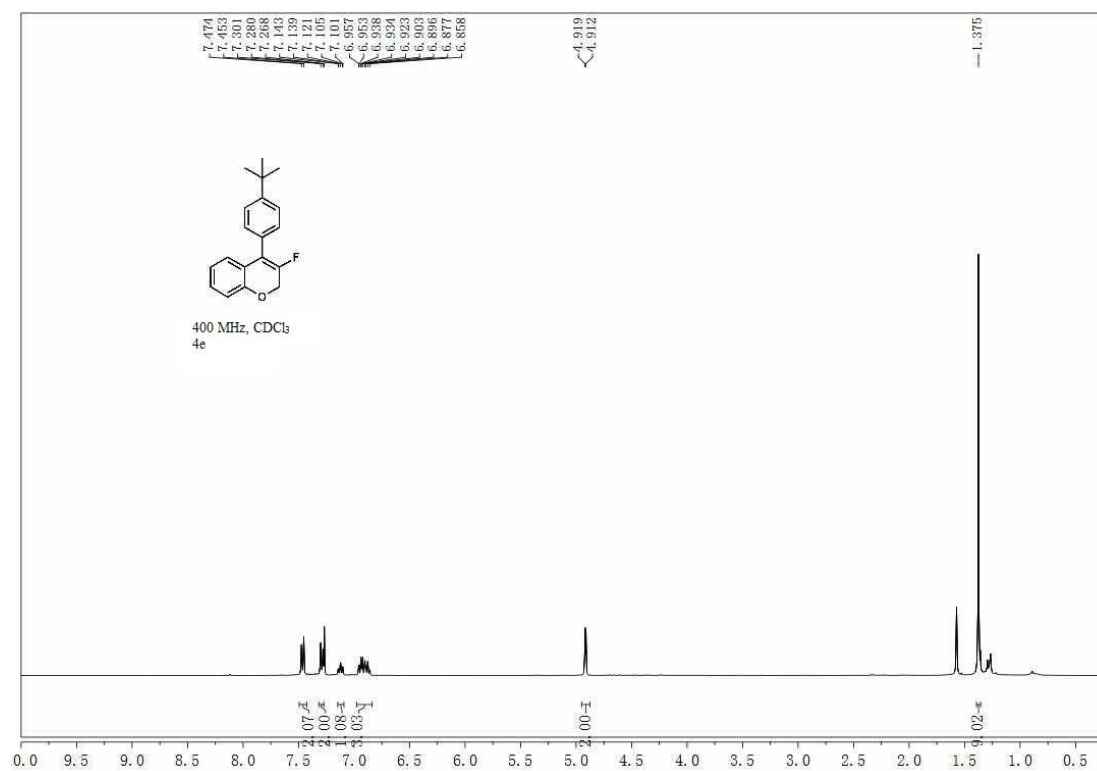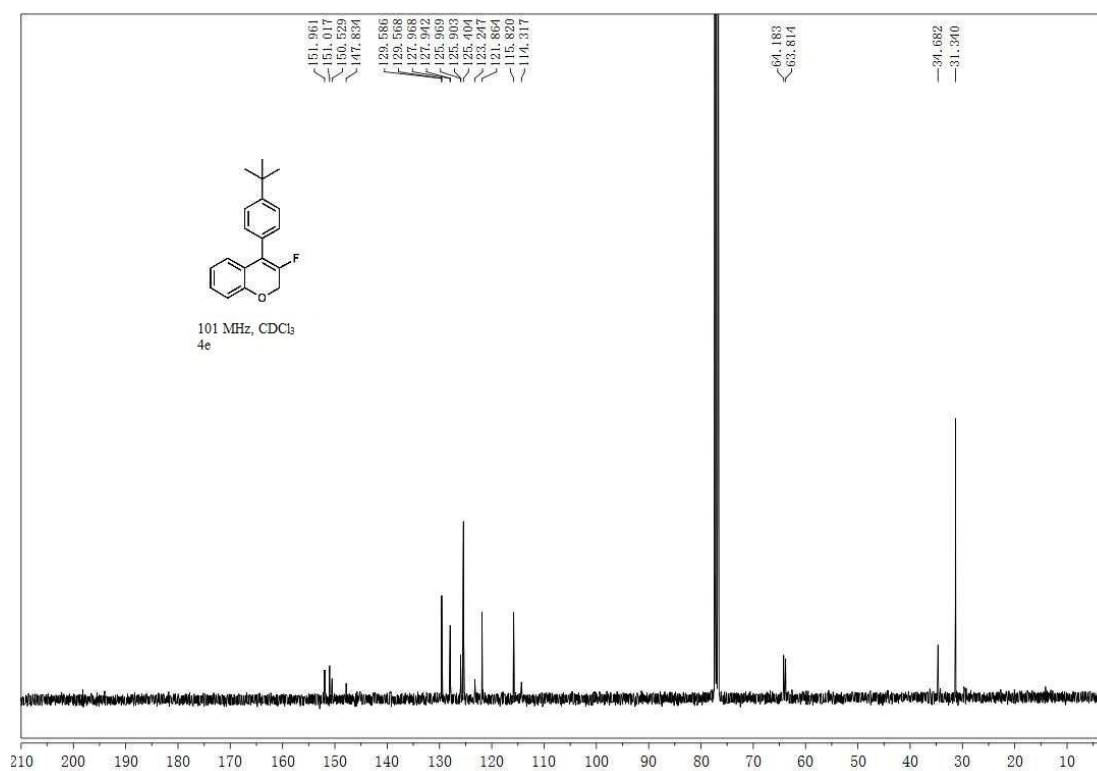

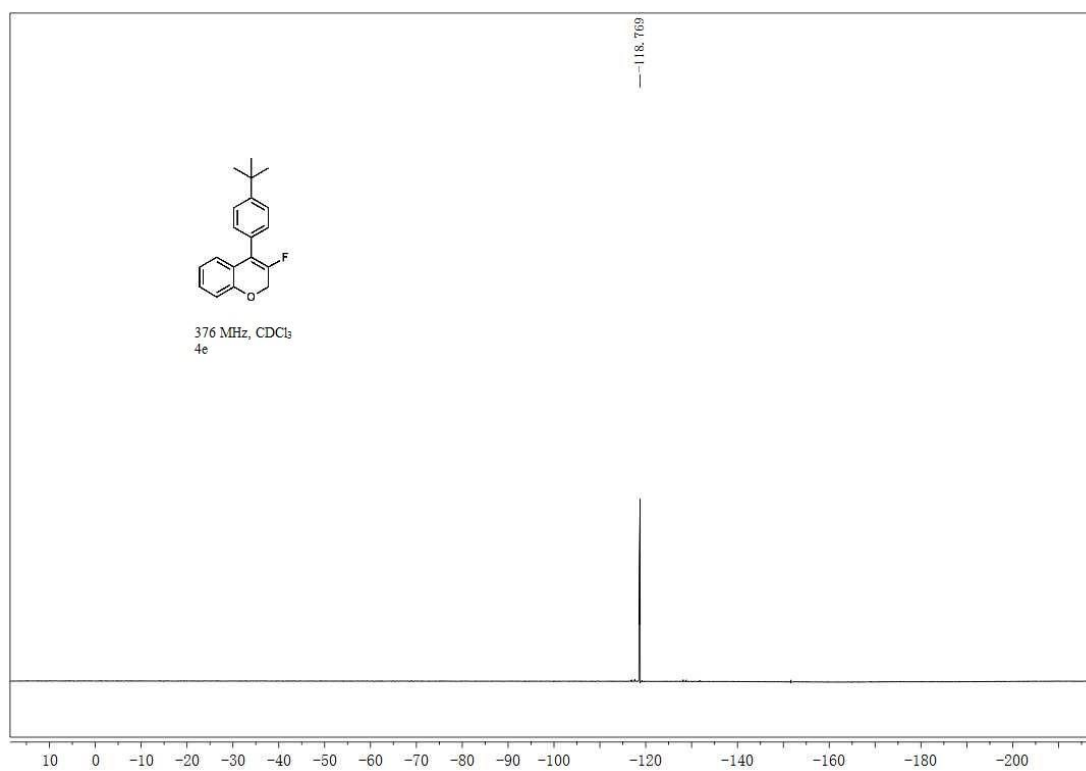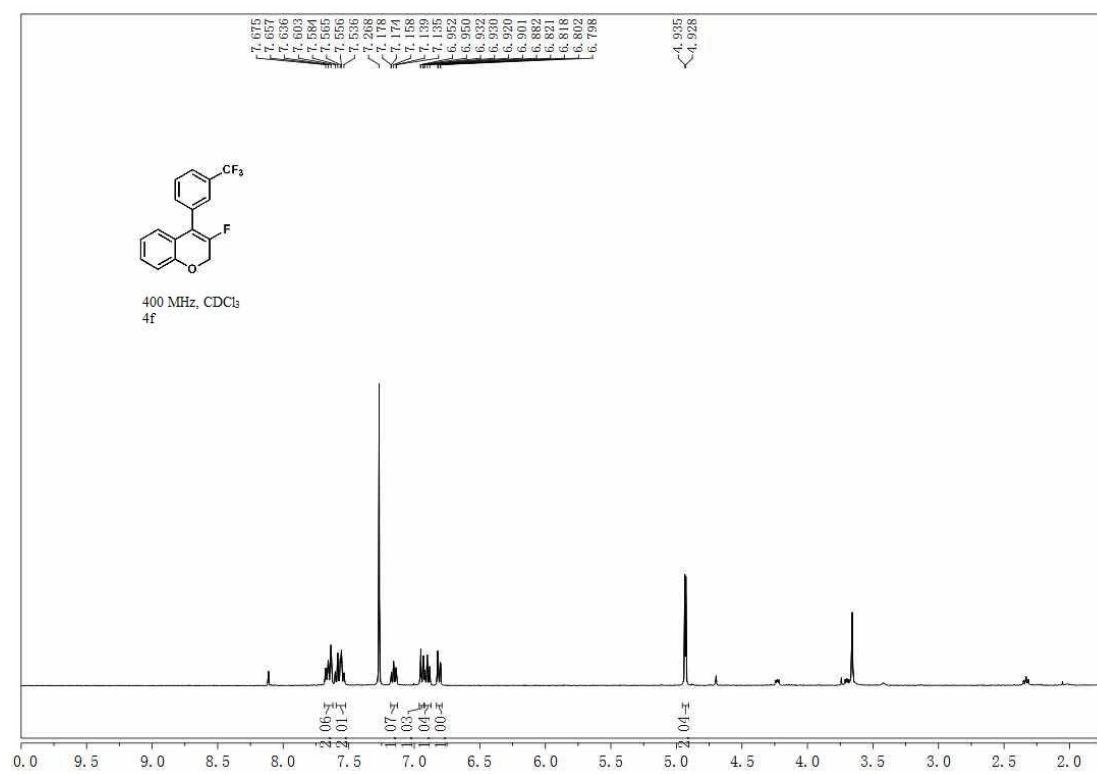

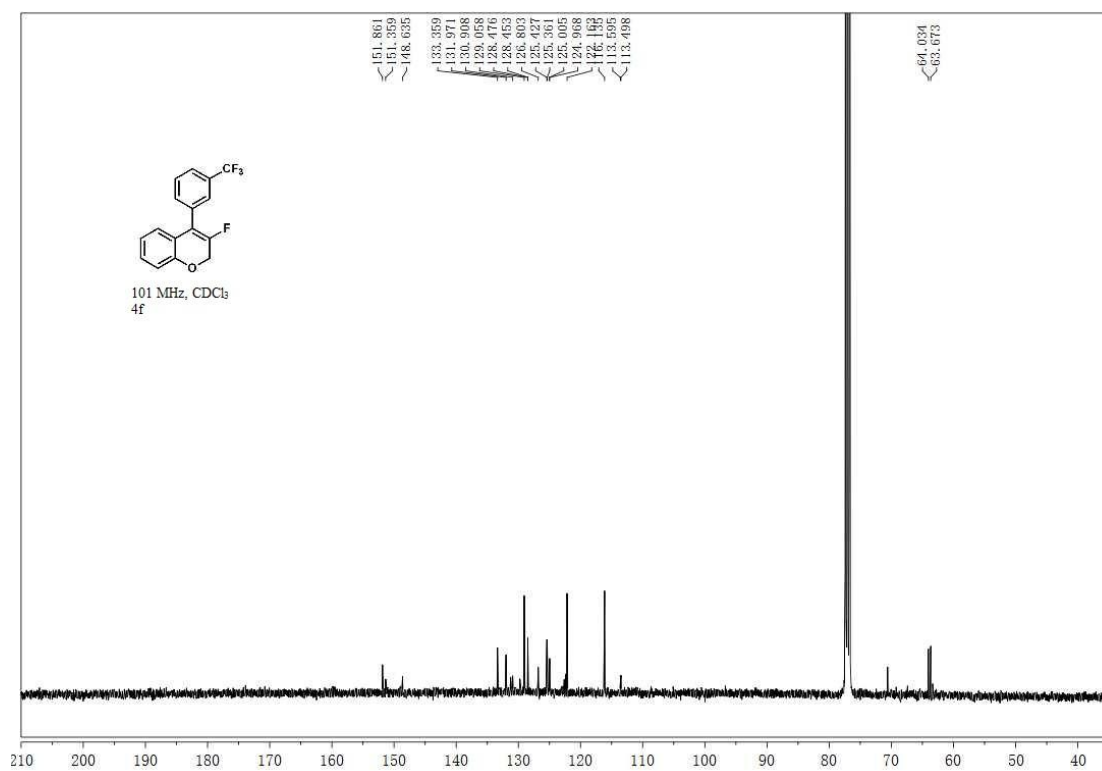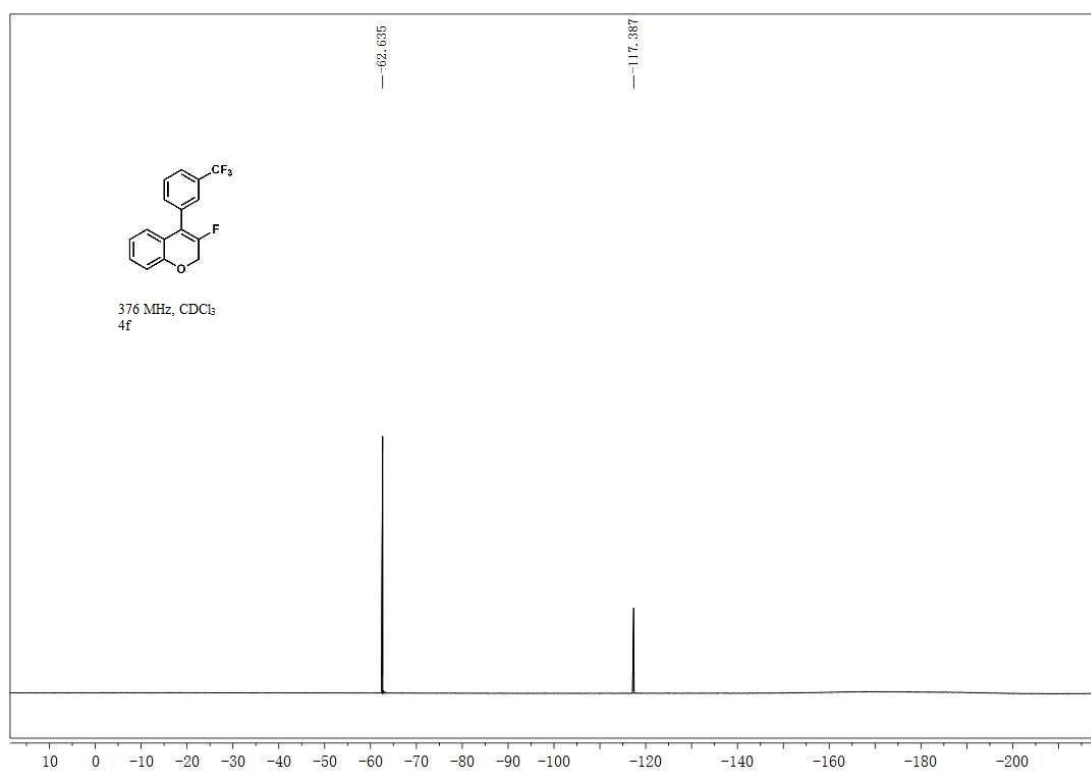

Supplement: c5cc01407g1.pdf [file c5cc01407g1.pdf]
